1  
2  
3 1 Full title: Variable expression of linguistic laws in ape gesture: a case study  
4  
5  
6 2 from chimpanzee sexual solicitation.  
7

8  
9 3  
10  
11 4 Short title: Linguistic laws in chimpanzee solicitation gestures.  
12  
13  
14 5  
15 6  
16 7

17  
18 7 Alexandra Safryghin<sup>1</sup>, Catharine Cross<sup>1</sup>, Brittany Fallon<sup>1</sup>, Raphaela Heesen<sup>3</sup>, Ramon Ferrer-i-  
19  
20  
21 8 Cancho<sup>2&</sup>, Catherine Hobaiter<sup>1,4&\*</sup>  
22  
23 9

24  
25  
26 10 <sup>1</sup>School of Psychology and Neuroscience, University of St Andrews, St Andrews, Fife, United Kingdom  
27

28 11 <sup>2</sup>Complexity and Quantitative Linguistics Laboratory, Laboratory for Relational Algorithmics,  
29

30 12 Complexity, and Learning Research Group, Departament de Ciències de la Computació, Universitat  
31

32 13 Politècnica de Catalunya, 08034 Barcelona, Catalonia, Spain  
33

34 14 <sup>3</sup>Department of Psychology, Durham University, Durham, United Kingdom  
35

36 15 <sup>4</sup>Budongo Conservation Field Station, Masindi, Uganda  
37  
38

39 16  
40  
41 17 \* Corresponding author  
42

43 18 Email: [clh42@st-andrews.ac.uk](mailto:clh42@st-andrews.ac.uk) (CH)  
44

45  
46 19 &These authors contributed equally to this work  
47

48 20 **Keywords:** compression, communication, Zipf, Menzerath, language  
49  
50  
51  
52  
53  
54  
55  
56  
57  
58  
59  
60

1  
2  
3  
4  
5  
6  
7  
8  
9  
10  
11  
12  
13  
14  
15  
16  
17  
18  
19  
20  
21  
22  
23  
24  
25  
26  
27  
28  
29  
30  
31  
32  
33  
34  
35  
36  
37  
38  
39  
40  
41  
42  
43  
44  
45  
46  
47  
48  
49  
50  
51  
52  
53  
54  
55  
56  
57  
58  
59  
60

21 **Abstract**

22 Two language laws have been identified as consistent patterns shaping animal behaviour,  
23 both acting on the organisational level of communicative systems. Zipf’s law of brevity  
24 describes a negative relationship between behavioural length and frequency. Menzerath’s  
25 law defines a negative correlation between the number of behaviours in a sequence and  
26 average length of the behaviour composing it. Both laws have been linked with the  
27 information-theoretic principle of compression, which tends to minimise code length. We  
28 investigated their presence in a case study of male chimpanzee sexual solicitation gesture.  
29 We failed to find evidence supporting Zipf’s law of brevity, but solicitation gestures followed  
30 Menzerath’s law: longer sequences had shorter average gesture duration. Our results  
31 extend previous findings suggesting gesturing may be limited by individual energetic  
32 constraints. However, such patterns may only emerge in sufficiently-large datasets.  
33 Chimpanzee gestural repertoires do not appear to manifest a consistent principle of  
34 compression previously described in many other close-range systems of communication.  
35 Importantly, the same signallers and signals were previously shown to adhere to these laws  
36 in subsets of the repertoire when used in play; highlighting that, in addition to selection on  
37 the signal repertoire, ape gestural expression appears shaped by factors in the immediate  
38 socio-ecological context.

## 44 Introduction

45 Over the past 100 years, important statistical regularities have been described across  
46 human languages and in other communicative systems such as genomes, proteins, and  
47 animal vocal and gestural communication (Altmann & Gerlach, 2016; Bentz & Ferrer-I-  
48 Cancho, 2016; Börstell et al., 2016; Hernández-Fernández et al., 2019; Köhler et al., 2005;  
49 Menzerath, 1954; Naranan & Balasubrahmanyam, 2000; Sanada, 2008; Semple et al., 2022;  
50 Wang & Chen, 2015; Zipf, 1936). These regularities are hypothesized to be manifestations of  
51 the information theoretic principle of compression (Ferrer-i-Cancho, Bentz, et al., 2022;  
52 Semple et al., 2022). Compression is a particular case of the principle of least effort (Zipf,  
53 1949) – a principle that promotes the outcome that requires the least amount of energy to  
54 produce or achieve – and thereby promotes coding efficiency (Ferrer-i-Cancho et al., 2013).  
55 In communication, compression is expressed as a pressure towards reducing the energy  
56 needed to compose a code but limited by the need to retain the critical information in the  
57 transmission (Cover & Thomas, 2006; Ferrer-i-Cancho et al., 2022).

58         Among the statistical patterns predicted by compression at different levels of  
59 organization, Zipf’s law of brevity and Menzerath’s law have been at the centre of recent  
60 attention in studies of human and non-human communication. Zipf’s law of brevity is the  
61 tendency for more frequent words to be shorter in length (Strauss et al., 2007; Zipf, 1949),  
62 and is generalised as the tendency for more frequent elements of many kinds (*e.g.*,  
63 syllables, words, calls) to be shorter or smaller (Ferrer-i-Cancho et al., 2013) – with similar  
64 patterns found at different levels of analysis, for example in speech at the level of words  
65 (Strauss et al., 2007) syllables (Rujević et al., 2021), and phonemes (Hernández-Fernández et  
66 al., 2019). As well as being found in human spoken, signed, and written languages (Bentz &  
67 Ferrer-I-Cancho, 2016; Börstell et al., 2016; Hernández-Fernández et al., 2019; Sanada,

1  
2  
3 68 2008; Wang & Chen, 2015), Zipf’s law of brevity has been identified in the short-range  
4  
5 69 communication of diverse taxa: dolphins (Ferrer-i-Cancho et al., 2022), bats (Luo et al.,  
6  
7 70 2013), penguins (Favaro et al., 2020), hyraxes (Demartsev et al., 2019), and various primates  
8  
9 71 (macaques: Semple et al., 2013; marmosets: Ferrer-i-Cancho & Hernández-Fernández, 2013;  
10  
11 72 gibbons: Huang et al., 2020; Indri indri: Valente et al., 2021), as well as in genomes (Naranan  
12  
13 73 & Balasubrahmanyam, 2000).

14  
15  
16  
17 74 At the level of constructs, Menzerath’s law states that “*the greater the whole, the*  
18  
19 75 *smaller its constituents*” (Altmann, 1980; Köhler, 2012; Menzerath, 1954); for example:  
20  
21 76 longer sentences have words of shorter average length, and words with more syllables  
22  
23 77 contain syllables of shorter length. Menzerath’s law (and its mathematical expression  
24  
25 78 known as the Menzerath-Altman’s law) has been identified in human spoken and signed  
26  
27 79 languages (Altmann, 1980; Andres et al., 2021), genomes (Ferrer-i-Cancho & Forns, 2009; Li,  
28  
29 80 2012), music (Boroda & Altmann, 1991), and in the communication of dolphins (Ferrer-i-  
30  
31 81 Cancho et al., 2022), penguins (Favaro et al., 2020), and primates (geladas: Gustison et al.,  
32  
33 82 2016; chimpanzees: Fedurek et al., 2017; Heesen et al., 2019; gibbons: Clink et al., 2020;  
34  
35 83 Huang et al., 2020; gorillas: Watson et al., 2020; Indri indri: Valente et al., 2021;). While  
36  
37 84 many studies focused on vocal communication, several have now explored these statistical  
38  
39 85 regularities in gestural and signed domains. For example, the use of Swedish Sign Language  
40  
41 86 in (semi-)spontaneous conversation was found to follow a pattern of more frequently used  
42  
43 87 signs being shorter in duration (Börstell et al., 2016). Zipf’s law of brevity was also found in  
44  
45 88 fingerspelling, with a negative relationship between mean fingerspelled sign duration and  
46  
47 89 frequency (Börstell et al., 2016). Similarly, Czech sign language was found to follow  
48  
49 90 Menzerath’s law (Andres et al., 2021). Work in non-human gesture has, to date, been more  
50  
51 91 focused on context-specific signal usage, for example: Zipf’s law of brevity was found in the

1  
2  
3 92 surface behaviour of dolphins (such as tail-slapping; Ferrer-i-Cancho & Lusseau, 2009) but  
4  
5  
6 93 not in the overall repertoire of play gestures of chimpanzees, where it was only present in  
7  
8 94 subsets, although these gestures did follow Menzerath's law (Heesen et al., 2019).  
9

10 95 Chimpanzee gestural communication represents a powerful non-human model in  
11  
12  
13 96 which to explore compression and language laws. Apes have large repertoires of over 70  
14  
15 97 distinct gesture types (Byrne et al., 2017); as compared to vocal communication, gestural  
16  
17  
18 98 repertoires are larger and are more flexibly deployed, with individual gesture types used to  
19  
20 99 achieve multiple goals (Bard et al., 2019; Call & Tomasello, 2007; Hobaiter & Byrne, 2011a;  
21  
22  
23 100 Liebal et al., 2004). Gestures are also used intentionally, *i.e.*, to reach social goals by  
24  
25 101 influencing the receivers' behaviour or understanding (Graham et al., 2018; Hobaiter &  
26  
27  
28 102 Byrne, 2011a, 2014; Schel et al., 2013), and flexibly across contexts (Call & Tomasello, 2007;  
29  
30 103 Hobaiter & Byrne, 2011a; Liebal et al., 2004). Nevertheless, Heesen et al.'s (2019) results  
31  
32  
33 104 support an increasingly diverse range of findings that show variation in the extent and  
34  
35 105 expression of language laws, suggesting that while they appear statistically universal there is  
36  
37  
38 106 room for exceptions and/or variation in patterning at different levels of the communicative  
39  
40 107 construct (Semple et al., 2022).

41  
42 108 Although a lack of evidence supporting Zipf's law of brevity has been previously  
43  
44  
45 109 reported (e.g., European heraldry: Miton & Morin, 2019; computer-based neural-networks:  
46  
47 110 Chaabouni et al., 2019), these remain rare exceptions, and in non-human animal  
48  
49  
50 111 communication have typically only been reported in long-distance vocal communication  
51  
52 112 (*e.g.* gibbon song: Clink et al., 2020; bats: Luo et al., 2013; although *cf.* female hyrax calls:  
53  
54  
55 113 Demartsev et al., 2019) where the impact of distance on signal transmission fidelity may  
56  
57 114 have a particularly strong effect on the costs of compression (Ferrer-i-Cancho et al., 2013;  
58  
59  
60

1  
2  
3 115 Gustison et al., 2016; Semple et al., 2022). Thus, at present, the repertoire-level absence of  
4  
5  
6 116 Zipf's law of brevity in chimpanzee gesture remains a conundrum.

7  
8 117 One explanation for a repertoire-level absence of Zipf's law of brevity – as seen in  
9  
10 118 some long-distance signals – is that the context in which signals are produced may impact  
11  
12  
13 119 the emergence and expression of these patterns. Specifically, in the case of chimpanzee  
14  
15 120 gestures, the absence of a pattern resembling Zipf's law of brevity may result from the use  
16  
17  
18 121 of gestures produced during play. Expressions of linguistic laws in biological systems reflect  
19  
20 122 pressures that shape efficient energy expenditure (Semple et al., 2022). Play is produced  
21  
22  
23 123 when there is an excess of time and energy (Held & Špinka, 2011; Pellis & Pellis, 1996;  
24  
25 124 Smith, 2014), thus, the energetic need to reduce signal effort through increased  
26  
27  
28 125 compression may be limited. As a result, it remains unclear whether the failure of Zipf's law  
29  
30 126 of brevity in chimpanzee gesture was due to the use of gestures from within play, or  
31  
32  
33 127 whether it reflects a system-wide characteristic.

34  
35 128 In both signed languages and human gesturing, distinctions are made between  
36  
37 129 different components of their production. First there is the *preparation* of the signal, then  
38  
39  
40 130 the *action stroke* which represents the movement that defines the gesture as of a particular  
41  
42 131 type; an individual can then choose to further *hold* the stroke or repeat it, until they decide  
43  
44  
45 132 to stop gesturing and return the limb to rest during *recovery* from the gestural action  
46  
47 133 (Kendon, 2004). For example: in a reach gesture this would correspond to the movement of  
48  
49  
50 134 the hand into position (*preparation*), the extension of the arm and hand towards the  
51  
52 135 recipient (*action stroke*), the (optional) maintenance of the extension (*hold*), and finally the  
53  
54  
55 136 return of the hand and arm to a resting state (*recovery*). All four of these phases require  
56  
57 137 some energetic investment to produce, but there may be variation across them, and aspects  
58  
59 138 such as preparation and recovery may be nearly, or entirely, absent where several gestures

1  
2  
3 139 are strung together. In some gesture types, their production does not include a *hold* phase  
4  
5  
6 140 (e.g., hit, jump, throw object); we term these *fixed* duration gestures, as the duration of  
7  
8 141 their expression is relatively constrained across instances of production. Other gesture types  
9  
10 142 can include a *hold* phase (for example: reach, object shake, swing) which may or may not be  
11  
12  
13 143 present, and, where present, may vary substantially in length; we term these *loose* duration  
14  
15 144 gestures. There may be differences in the emergence of Zipf's and Menzerath's laws  
16  
17  
18 145 regarding the different components of gesture production. Menzerath's law acts from a  
19  
20 146 proximate perspective on the building of communicative sequences in a specific  
21  
22  
23 147 communicative instance: for example, gestures produced in longer sequences may be  
24  
25 148 shortened by variation the duration of components such as the shortening of the *hold* phase  
26  
27  
28 149 in loose gesture types. In contrast, Zipf's law acts on gesture types across instances of use –  
29  
30 150 and as such may be less sensitive to the immediate context of production.

31  
32 151 Another possible explanation for the variation in the emergency of compression in  
33  
34  
35 152 ape gesture is that the ability to detect linguistics laws, particularly where they are only  
36  
37  
38 153 subtly expressed, appears to require powerful datasets. The exploration of statistical  
39  
40 154 patterns in human languages often employs corpora containing millions of data points (e.g.,  
41  
42 155 Hatzigeorgiu et al., 2001). In contrast, in ape gesture, as in many studies of non-human  
43  
44  
45 156 communication, datasets are substantially smaller (in the thousands). In chimpanzee play,  
46  
47  
48 157 the large repertoire expressed limits the frequency with which particular gesture types are  
49  
50 158 represented.

51  
52 159 We address this open question in a case study of chimpanzee gestural  
53  
54  
55 160 communication in sexual solicitation. While gesture is relatively under-studied in this area,  
56  
57  
58 161 sexual solicitations have been contrasted with early descriptions of gesture from studies of  
59  
60 162 captive ape play, as an example of gesture in a relatively more evolutionarily or biologically

1  
2  
3 163 'relevant' context for communication (in terms of associated risks and/or impact on  
4  
5  
6 164 reproduction) (Hobaiter & Byrne, 2012; *c.f.* Call & Tomasello, 2007). Chimpanzees,  
7  
8 165 particularly male chimpanzees, employ prolific use of individual gestures and gesture  
9  
10 166 sequences in sexual solicitations. As solicitations are often vigorous, chimpanzees  
11  
12  
13 167 incorporate regular use of gesture types that include both visual and audible information  
14  
15 168 (Hobaiter & Byrne, 2012; Nishida, 1980). While a range of gesture types are employed,  
16  
17 169 these are typically a smaller sub-set of the available repertoire – *c.f.* play where the majority  
18  
19  
20 170 of gesture types are deployed. Successful gestures can lead directly to sexual behaviour,  
21  
22  
23 171 such as inspection or copulation, as well as to a consortship, in which the female follows the  
24  
25 172 male away from other individuals in the group so that he maintains exclusive sexual access  
26  
27  
28 173 (Tutin, 1979). Both direct solicitation and consortship and are key strategies for individual  
29  
30 174 fitness (Tutin, 1979; Watts, 2015), and as such behaviour associated with them is likely  
31  
32 175 subject to strong selective pressures. The energetic costs of lactation mean that adult  
33  
34  
35 176 female chimpanzees typically conceive only once every 4-5 years (Clark, 1977; Thompson,  
36  
37 177 2013). So while there are typically 60-80 individuals in a group, the operational sex ratio of  
38  
39  
40 178 available females in estrus may be very small, and males show substantial variation in  
41  
42 179 reproductive success (Newton-Fisher et al., 2009; Tutin, 1979). Although highly important,  
43  
44  
45 180 the performance of sexual solicitations may come with significant costs: besides the  
46  
47 181 energetic expenditure in producing these signals, there is a risk of potentially aggressive  
48  
49  
50 182 competition both from other males in their own community (Fawcett & Muhumuza, 2000;  
51  
52 183 Tutin, 1979) as well as potentially lethal attacks from males in neighbouring groups (Wilson  
53  
54 184 et al., 2014). For example, during consortships individuals may travel to the boundaries of  
55  
56  
57 185 their home area, increasing the risk of encounters with neighbouring individuals. Thus, there  
58  
59 186 are substantial advantages to avoiding potential eavesdroppers within, and particularly



1  
2  
3 187 outside of, one's community (Hobaiter et al., 2017). Therefore, on one hand individuals  
4  
5 188 benefit from producing conspicuous energetic signals to attract females, often having to  
6  
7  
8 189 insist to secure mating; on the other, the production of highly conspicuous signals should be  
9  
10 190 compressed to reduce the risks associated with competition from both within and outside  
11  
12  
13 191 the group.

14  
15 192 To assess compression in the sexual solicitation gestures of wild male chimpanzees,  
16  
17 193 we tested for patterns predicted by Zipf's law of brevity and Menzerath's law, both at the  
18  
19  
20 194 level of single gesture types and gesture sequences, respectively. To investigate Zipf's law of  
21  
22  
23 195 brevity and Menzerath's law we fitted two generalised linear mixed models. The first model  
24  
25 196 explored the presence of Zipf's law assigning gesture duration as the response variable,  
26  
27 197 proportion of gestures within the dataset and category of gesture (manual vs whole body)  
28  
29  
30 198 as fixed factors, and signaller's ID, sequence ID, and gesture type as random factors. The  
31  
32  
33 199 second model tested for Menzerath's law and had gesture duration as response variable,  
34  
35 200 sequence size as a fixed factor, and proportion of whole-body gestures in the sequence  
36  
37 201 (PWB), signaller ID, sequence ID, and gesture type as random factors. We included  
38  
39  
40 202 information on the category of the gesture to allow for comparisons with human studies, in  
41  
42 203 which gestures are mostly manual. We provide matched models that describe the patterns  
43  
44  
45 204 of expression both across (i) all males in our data, (ii) for a single prolific individual and (iii)  
46  
47 205 for the remaining individuals. In doing so, we provide an initial assessment of the  
48  
49  
50 206 distribution of our findings across male chimpanzee gesturing in this context and provide an  
51  
52 207 expanded assessment of compression in ape gestural communication.

## 53 54 208 **Results**

55  
56  
57 209 We measured  $N=560$  sexual solicitation gestures from 173 videos of 16 wild, habituated  
58  
59 210 male East African chimpanzees (*Pan troglodytes schweinfurthii*) gesturing to 26 females.

1  
2  
3 211 Within the 560 gestural instances (from now *tokens*), we identified 26 gesture types: 21  
4  
5 212 manual gestures and 5 whole-body gestures (Figure 1; for definitions for full repertoire  
6  
7 213 definitions see Table S1 in supporting Information 1) performed by 16 male chimpanzees  
8  
9  
10 214 aged 10-42 years old. On average, each individual produced a median of  $11.5 \pm 70.7$  gesture  
11  
12 215 tokens (range 2-290). One male, Duane, was particularly prolific ( $n=290$  gesture tokens;  
13  
14 216 other males 2-76). To provide context as to what extent our findings are generalizable, we  
15  
16 217 provide matched analyses using both the full dataset and the dataset limited to Duane only.  
17  
18 218 An analysis of the data excluding Duane is available in the supplementary information.  
19  
20  
21

22 219         Gesture token duration was measured via analysis of video data with a minimum  
23  
24 220 unit of 0.04s (one frame). Duration ranged from 0.04-15.04 seconds (median:  $1.56 \pm 2.35s$ ).  
25  
26 221 If consecutive gesture tokens were performed with less than 1s in between them, they were  
27  
28 222 considered to form a sequence (Heesen et al., 2019; Hobaiter & Byrne, 2011b). We detected  
29  
30 223 a total of 377 sequences, with each male performing a median of  $8 \pm 44.54$  sequences (range  
31  
32 224 1-181 sequences). Sequence length ranged from 1 to 6 tokens (Table 1). For analyses of  
33  
34 225 Menzerath's law we excluded 18 sequences for which we were unable to identify the  
35  
36 226 duration of all the consecutive gesture tokens performed, resulting in the analysis of 359  
37  
38 227 sequences, containing a total of 530 gesture tokens. 244 sequences were composed of a  
39  
40 228 single token, the remaining 115 sequences had length  $n>1$ . Of the 115 sequences analysed  
41  
42 229 that were composed of 2 or more gesture tokens; 26 (23%) were formed by the repetition  
43  
44 230 of the same gesture type, whereas the remaining 89 (77%) included more than one gesture  
45  
46 231 type (Table 1).  
47  
48  
49  
50  
51  
52

53  
54  
55 232 **Do chimpanzee sexual solicitation gestures follow Zipf's law of brevity?**  
56  
57  
58  
59  
60

1  
2  
3 233 To test for Zipf's law we ran a Bayesian generalised linear model (Zipf-model), with the log  
4  
5  
6 234 of gesture duration as the response variable and the proportion of gesture type within the  
7  
8 235 dataset as a fixed factor (see Supporting information 2 for further detail). The gesture  
9  
10 236 duration data was log-transformed following an analysis of data distribution. We included  
11  
12 237 category of gesture as a control, and signaller ID, sequence ID, and gesture type as random  
13  
14 238 factors. The Zipf-model fitted the data better than a null model that did not include the  
15  
16 239 proportion of gesture type as a fixed effect (Leave-one-out [LOO] difference and s.d.=  $-0.7 \pm$   
17  
18 240  $0.3$ ). For Zipf-model effects Bulk ESS and Tail ESS were  $>100$  and  $\hat{R}=1$ . However, the  
19  
20 241 proportion of gesture type did not have a substantial effect on the duration of gestures  
21  
22 242 (Supporting information 3, Table S5;  $b = 0.90$ , s.d. =  $1.26$ , 95% Credible Intervals (CrI)  $[-1.25,$   
23  
24 243  $3.81]$ , Figure 2A). When testing the subset of data containing only the gestures produced by  
25  
26 244 Duane, the full model and null model testing for Zipf's law showed similar fit (LOO  
27  
28 245 difference:  $-0.1 \pm 0.7$ ; Supporting information 3, Table S6, Figure 2B). Similarly, in the same  
29  
30 246 analysis on data from all individuals except Duane, the full model was no different from the  
31  
32 247 null model (LOO difference:  $-0.5 \pm 0.5$ ; Supporting information 3, Table S7).

#### 248 **Do chimpanzee sexual solicitation gesture sequences follow Menzerath's law?**

249 To test for Menzerath's law we ran a second Bayesian model (Menzerath-model) with the  
250  
251 log of the gesture duration as response variable, the sequence size as fixed factor, the  
252  
253 proportion of whole-body gestures within the sequence (PWB) as a control, and the  
254  
255 signaller ID and sequence ID as random factors. The Menzerath-model fitted the data better  
256  
257 than the null model (LOO difference:  $-7.7 \pm 4.1$ ). All predictors had Bulk ESS and Tail ESS  $>100$   
258  
259 as well as  $\hat{R}$  values =1. Sequence size had a substantial negative effect on gesture duration  
260  
261 within sequence (Supporting information 3, Table S8;  $b = -0.18$ , s.d. =  $0.04$ , 95% CrI  $[-0.26, -$

1  
2  
3 256 0.11]; Figure 3A). Similar results were found when running the same Menzerath-model but  
4  
5  
6 257 limited to gestures produced by Duane: the full model fitted the data better than the null  
7  
8 258 (LOO difference:  $-13.5 \pm 4.5$ ), all predictors had Bulk ESS and Tail ESS > 100,  $\hat{R} = 1$  and  
9  
10 259 sequence size had a substantial negative effect on gesture duration (Supporting information  
11  
12  
13 260 3, Table S9, Figure 3B;  $b = -0.23$ , s.d. = 0.04, 95% CrI [-0.31, -0.15]). In contrast, where  
14  
15 261 Duane's data were excluded, the full model was similar to the null model, suggesting no  
16  
17  
18 262 clear pattern consistent with Menzerath's law (LOO difference:  $-0.3 \pm 0.8$ ; Supporting  
19  
20 263 information 3; Table S10). Visual inspection of the data plotted per individual suggests that  
21  
22  
23 264 detection of a pattern consistent with Menzerath's law may be impacted by sample size  
24  
25 265 (Supporting Information 4).

26  
27 266 We note that the sample size of sequences of four tokens or longer is smaller than  
28  
29  
30 267 those of one to three tokens (Table 1), which may have contributed to the apparent tailing  
31  
32  
33 268 off of a clear relationship in Figure 3A and Figure 3B. In addition, longer sequences were  
34  
35 269 formed of a) a mix of *loose* and *fixed* duration gestures or b) only *loose* duration gestures  
36  
37  
38 270 (see supporting information 5, Figures S5 and S6). Thus, the emergence of Menzerath's law  
39  
40 271 could not be explained by a shift in preference from *fixed* to *loose* gestures with increasing  
41  
42 272 sequence length.

43  
44  
45 273

## 46 47 274 **Discussion**

48  
49  
50 275 Chimpanzee sexual solicitation gestures did not follow Zipf's law of brevity: the frequency of  
51  
52 276 gesture type within the dataset did not predict gesture duration in any of our samples.  
53  
54  
55 277 However, sequences of chimpanzee solicitation gestures did follow Menzerath's law: longer  
56  
57 278 sequences of gestures were made up of gestures of shorter average length. Our dataset was  
58  
59 279 limited both by its relatively small size (*c.f.* Heesen et al., 2019 on chimpanzee play gestures)

1  
2  
3 280 and in its bias towards a single highly prolific individual (Duane). As a result, we consider it a  
4  
5 281 case-study; however, the pattern was present in both the Duane's data and in the full  
6  
7 282 dataset, as well as in a range of alternative analyses (Supporting Information 6). In the  
8  
9  
10 283 reduced dataset excluding Duane we did not find a pattern consistent with Menzerath's  
11  
12  
13 284 law; however, detection of the pattern may have been limited by the small sample size  
14  
15 285 available in the remaining data set.

16  
17  
18 286 These results represent a further absence of evidence in support of Zipf's law of  
19  
20 287 brevity in great ape gestural communication (Heesen et al., 2019) and support the wider  
21  
22 288 finding that – unlike most other close-range systems of communication described to date –  
23  
24  
25 289 the expression of pressure for compression and efficiency may be variably expressed in ape  
26  
27 290 gesture (Börstell et al., 2016; Ferrer-i-Cancho et al., 2013; Semple et al., 2022). It particularly  
28  
29 291 highlights that compression does not act on communicative systems uniformly: 20 of the 26  
30  
31 292 gesture types described here as used in sexual solicitations overlapped with those used in  
32  
33  
34 293 play (Heesen et al., 2019). Data were collected from the same community over the same  
35  
36  
37 294 period, and although both studies provided a null result when analysing the full gestural  
38  
39 295 repertoire, Zipf's law was found in subsets of the play gestures but not in the gestures when  
40  
41 296 used in sexual solicitations. Moreover, when running traditional correlation analyses in  
42  
43  
44 297 which features such as signaller identity, or gesture type could not be controlled for, we  
45  
46  
47 298 found a tendency for an opposite Zipf's law pattern – particularly in manual gestures  
48  
49 299 (Supporting Information 6). Visual inspection of the Figure 3 shows the substantial variation  
50  
51  
52 300 in the duration of gestures across instances of communication, as well as an apparent  
53  
54 301 decrease in a clear relationship between gesture duration and sequence size where sample  
55  
56  
57 302 size was small (such as for longer sequences). Together these findings suggest that the  
58  
59 303 expression of these laws is nuanced by aspects of the communicative landscape in which

1  
2  
3  
4  
5  
6  
7  
8  
9  
10  
11  
12  
13  
14  
15  
16  
17  
18  
19  
20  
21  
22  
23  
24  
25  
26  
27  
28  
29  
30  
31  
32  
33  
34  
35  
36  
37  
38  
39  
40  
41  
42  
43  
44  
45  
46  
47  
48  
49  
50  
51  
52  
53  
54  
55  
56  
57  
58  
59  
60

304 they are deployed, and that large samples may be needed to detect sometimes subtle  
305 relationships. Future work could specifically explore variation in the detection of these  
306 patterns at different sample sizes, for example by randomised subsetting of sufficiently  
307 large datasets. As Semple et al. (2022) suggest, apparent ‘failures’ may be of substantial  
308 assistance in exploring the boundaries of the theoretical framework of these laws, helping  
309 to define the characteristics that shape both their emergence and variation in their  
310 expression.

311 In contrast to vocal communication across primate species, in chimpanzee sexual  
312 solicitations ‘inefficiency’ in signalling effort by the signaller appears to be at times slightly  
313 favoured. However, these gestures appear to remain effective in terms of achieving the  
314 signaller’s goal of successful communication in a context vital for reproductive success.  
315 Given the long inter-birth intervals and active mate guarding (Muller & Wrangham, 2009),  
316 chimpanzee paternity is often heavily biased towards higher-ranking individuals (Newton-  
317 Fisher et al., 2009). With so few opportunities to mate, sexual solicitations may represent  
318 one of the most evolutionarily important contexts in which chimpanzee gestures are  
319 produced. Where the costs of signal failure are high, there is a pressure against compression  
320 and towards redundancy, as in chimpanzees’ use of gesture-vocal signal combinations in  
321 agonistic social interactions (Hobaiter et al., 2017). While there are examples of vocal  
322 communication systems used in biologically ‘relevant’ contexts that adhere to Zipf’s brevity  
323 law (Favaro et al., 2020), the benefits of successful communication to individual fitness in  
324 chimpanzee solicitation appear to outweigh the energetic costs associated with the  
325 production of a vigorous and conspicuous signal. Nevertheless, given that we see a relatively  
326 consistent expression of Menzerath’s law across gesture use in sexual solicitation as in play,  
327 even the production these prolonged and conspicuous signals appear to remain constrained

1  
2  
3 328 by physiological mechanisms of gestural production. As for primate vocal communication  
4  
5 329 (Fedurek et al., 2017; Gustison et al., 2016), where breathing constraints and energetic  
6  
7 330 demands of vocal production were considered drivers for the emergence of Menzerath’s  
8  
9 331 law patterns, increased muscular activity related to the production of sequences of gestures  
10  
11 332 (Scott, 2008) could be a general limit on energetic investment. As a result, Menzerath’s law  
12  
13 333 appears to emerge across communicative contexts.  
14  
15  
16  
17

18 334 There are a number of potential reasons for why language laws appear variable in  
19  
20 335 their expression within ape gesture. For example, we might be considering the wrong unit of  
21  
22 336 analysis. In human speech, sign, and gesture – as in other communication systems – it is  
23  
24 337 possible to consider the production of a ‘unit’ of communication at different levels. For  
25  
26 338 example, while Zipf’s law is clearly expressed in the duration of male rock hyrax  
27  
28 339 vocalisations, that is not the case for female vocalisations where Zipf’s law of brevity  
29  
30 340 emerges when analysing call amplitude rather than duration (Demartsev et al., 2019).  
31  
32 341 Conversely, in Börstell et al. (2016) research on Swedish Sign Language, Zipf’s law of brevity  
33  
34 342 seems to hold across sign categorisation, fingerspelling, and compounding. Interestingly,  
35  
36 343 this study excluded the hold phase of a sign, limiting their analysis only to the more active  
37  
38 344 stroke phase.-The production of intentional gestures in apes are shaped not only by the  
39  
40 345 signaller, but by the interaction between signaller and recipient (Byrne et al., 2017; Graham  
41  
42 346 et al., 2022). As a result, the duration of hold or repetition phase may be shaped by the  
43  
44 347 immediate context of the specific interaction – for example, in waiting for a response by the  
45  
46 348 recipient it may vary between being absent and very prolonged. In contrast, the *action*  
47  
48 349 *stroke* of a sign or gesture is always present and represents the need to convey information  
49  
50 350 in that gesture, i.e., to discriminate it from other gesture actions. In Swedish Sign Language  
51  
52 351 a prolonged and repetitive feedback sign and prolonged turn taking signs were the only two  
53  
54  
55  
56  
57  
58  
59  
60

1  
2  
3 352 cases that diverged from the general Zipf's pattern, as they were both long in duration as  
4  
5  
6 353 well as being highly frequent (Börstell et al., 2016). Zipf's law acts on a signal 'type' in an  
7  
8 354 individual's or species' repertoire – and it may be of interest to compare its expression  
9  
10  
11 355 across areas of gesture production that are more consistently produced across usage, such  
12  
13 356 as the action stroke.

15 357         Research to date has typically focused on signal compression at the level of the  
16  
17  
18 358 communication system, but communication happens *in-situ*. Signallers likely respond to  
19  
20 359 pressures on signalling efficiency more broadly: an intense but time-limited investment in  
21  
22  
23 360 clear signalling may be more energetically efficient than the need to travel with a female for  
24  
25 361 extended periods following a failed signal. A similar solicitation with a different audience  
26  
27  
28 362 may need to be produced rapidly and inconspicuously, as the detection of this activity by  
29  
30 363 other males could be fatal (Fawcett & Muhumuza, 2000). In a recent human study,  
31  
32  
33 364 pressures towards efficiency and accuracy were both required for Zipf's law of brevity to  
34  
35 365 emerge in experimental communicative tasks between two participants (Kanwal et al.,  
36  
37  
38 366 2017). Conversely, when participants were required to produce solely time-efficient vs  
39  
40 367 solely accurate communicative signals no pattern emerged. The sexual solicitation context  
41  
42  
43 368 tested in our study may mirror the pattern seen in the time-efficient paradigm in the human  
44  
45 369 study. In play, where urgency and time-efficiency may be less relevant, the same signals  
46  
47  
48 370 used by the same chimpanzees did show compression. While many vocalizations are  
49  
50 371 relatively fixed (Janik & Slater, 1997; Fitch et al., 2016), gestural flexibility (in goal and  
51  
52 372 context – Bard et al., 2019; Call & Tomasello, 2007; Hobaiter & Byrne, 2011a; Liebal et al.,  
53  
54 373 2004) allows us to explore how compression acts within both specific instances of  
55  
56  
57 374 communication as well as on whole communication systems. To do so will require large  
58  
59 375 longitudinal datasets in which it is possible to test both between-individual variation and



1  
2  
3 376 within-individual variation across different gesture types and sequence lengths. Similarly,  
4  
5  
6 377 there remains substantial work needed to explore variation across different socio-ecological  
7  
8 378 contexts of gesture use, for example in the social relationship between the signaller and  
9  
10 379 recipient (Graham et al., 2022). The use of redundancy within specific subsets of gestural  
11  
12  
13 380 repertoire, or within specific contexts of gesture demonstrates both the importance of  
14  
15 381 compression in communicative systems in general, but also the flexibility present in each  
16  
17 382 specific usage. In doing so, it highlights the importance of exploring the impact of individual  
18  
19  
20 383 and socio-ecological factors within wider patterns of compression in biological systems in  
21  
22  
23 384 evolutionary salient scenarios.

## 26 385 **Methods**

27  
28  
29 386 We measured  $N=560$  male to female sexual solicitation gestures from 173 videos recorded  
30  
31 387 within a long-term study of chimpanzee gestural communication depicting 16 wild,  
32  
33  
34 388 habituated East African chimpanzees (*Pan troglodytes schweinfurthii*) from the Sonso  
35  
36 389 community of the Budongo Forest Reserve in Uganda ( $1^{\circ}35'$  and  $1^{\circ}55'N$  and  $31^{\circ}08'$  and  
37  
38  
39 390  $31^{\circ}42'$  E), collected between December 2007 and February 2014. Observations were made  
40  
41 391 between 7.30am and 4.30pm with recording of gestures following a focal behaviour  
42  
43  
44 392 sampling approach (Altmann, 1974). Here, all social interactions were judged to have the  
45  
46 393 potential for gesture, in practice any situation in which two chimpanzees were in proximity  
47  
48  
49 394 and not involved in solitary activities, were targeted. Where several potential opportunities  
50  
51 395 to record co-occurred, preference was given to individuals from whom fewer data had been  
52  
53  
54 396 collected (with a running record of data collection maintained to facilitate these decisions).

55  
56 397 During October 2007 to August 2009 a Sony Handycam (DCR-HC-55) was used. Here  
57  
58 398 video was recorded on MiniDV tape. The challenges of filming wild chimpanzees in a visually  
59  
60

1  
2  
3  
4  
5  
6  
7  
8  
9  
10  
11  
12  
13  
14  
15  
16  
17  
18  
19  
20  
21  
22  
23  
24  
25  
26  
27  
28  
29  
30  
31  
32  
33  
34  
35  
36  
37  
38  
39  
40  
41  
42  
43  
44  
45  
46  
47  
48  
49  
50  
51  
52  
53  
54  
55  
56  
57  
58  
59  
60

399 dense rainforest environment meant that, at times, the start of gestural sequences was not  
400 captured on video. Where this occurred, it was dictated onto the end of the video and these  
401 sequences were not included in analysis. Similarly, sequences in which part of the sequence  
402 was obscured, for example where a chimpanzee moves through dense undergrowth, were  
403 also discarded. After 2009 video data were collected using Panasonic camcorders (V770, HC-  
404 VXF1) were used which have a 3-second pre-record feature that improves the ability to  
405 capture the onset of behaviour; however, the same procedure was used and any sequences  
406 where the onset of gesturing was not clearly captured continued to be discarded.

407 **Sexual solicitation gestures**

408 Sexual solicitation gestures were defined as those gestures given by a male towards a  
409 female with the goal of achieving sex, usually accompanied by the male having an erection  
410 and the female being in oestrus (Hobaiter & Byrne, 2011a, 2012). We included solicitations  
411 in the context of sexual consortship; here a male gestures in order to escort a female away  
412 from the group to maintain exclusive sexual access, which can occur prior to the peak of the  
413 female oestrus (Tutin, 1979). We restricted our analyses to male to female sexual  
414 solicitation, as female to male sexual solicitation attempts rarely involved sequences of  
415 gestures in this population. We further restricted analysis to solicitations by male individuals  
416 of at least 8-years old, as this is the minimum age of siring recorded in this community,  
417 limiting our signals to those on which there is more direct selective pressure.

418 **Defining gesture types and tokens**

419 In quantitative linguistics, word *types* are used to assess Zipf's law of brevity, whereas  
420 *tokens* are used to assess patterns conforming to Menzerath's law. To distinguish the two,  
421 consider the question:

1  
2  
3 422 *Which witch was which?*

4  
5  
6 423 The question is composed of 4 *tokens* (overall word count), and three different word *types*,  
7  
8 424 (which, witch, was). Gesture *types* (see S4 Table for a detailed repertoire description) were  
9  
10 425 categorized according to the similarity of the gesture movement, which could be used either  
11  
12 426 as a single instance or in a sequence; and each gestural instance represented an individual  
13  
14 427 *token*.

15  
16  
17 428 Great apes deploy gestural sequences in two distinct forms (Hobaiter & Byrne,  
18  
19 429 2011b): one is the addition of further gestures following response waiting and is typically  
20  
21 430 described as persistence (which may include elaboration). The second is the production of  
22  
23 431 gestures in a ‘rapid sequence’ – here gestures are produced with less than 1 second  
24  
25 432 between consecutive gesture tokens, and do not meet behavioural criteria for response-  
26  
27 433 waiting occurring within a sequence (although it may occur at the end of it). As the  
28  
29 434 expression of Menzerath’s law is typically considered at the level of a unique sequence,  
30  
31 435 rather than one generated through the addition of gestures in response to earlier failure,  
32  
33 436 we limit our analyses here to rapid sequences only. Sequence length was quantified as the  
34  
35 437 number of gesture tokens produced with less than 1s between two consecutive gesture  
36  
37 438 tokens; single gestures were coded as sequences of length one (Heesen et al., 2019;  
38  
39 439 Hobaiter & Byrne, 2011b).

40  
41  
42 440 **Gesture duration**

43  
44  
45 441 Gesture duration was calculated using MPEG streamclip (version 1.9.3beta). We measured  
46  
47 442 gesture duration in frames, each lasting 0.04s. Gestural ‘units’ – like many other signals –  
48  
49 443 can be considered at different levels of analysis, for example: a word is composed of  
50  
51 444 syllables, and syllables of phonemes. Gestures have been described as composed of a  
52  
53  
54  
55  
56  
57  
58  
59  
60

1  
2  
3  
4  
5  
6  
7  
8  
9  
10  
11  
12  
13  
14  
15  
16  
17  
18  
19  
20  
21  
22  
23  
24  
25  
26  
27  
28  
29  
30  
31  
32  
33  
34  
35  
36  
37  
38  
39  
40  
41  
42  
43  
44  
45  
46  
47  
48  
49  
50  
51  
52  
53  
54  
55  
56  
57  
58  
59  
60

445 preparation, action stroke, hold or repetition, and recovery phase (Kendon, 2004). Here we  
446 follow previous work in (Heesen et al., 2019) in defining the start of a gesture token as the  
447 initial movement of a part of the body required to produce the gesture. The end of a  
448 gesture token corresponded to (1) the cessation of the body movement related to gesture  
449 production, or (2) a change in body positioning if the gesture relied on body alignment, or  
450 (3) the point at which the goal was fulfilled, and any further movement represented  
451 effective action (for example, locomotion or copulation). Where the expression of a gesture  
452 token did not include a full recovery (in which the body part involved is returned to a resting  
453 state), the end of a token was discriminated from subsequent tokens through (1) a change  
454 in gesture action, e.g., from a reach to a shake, (2) a change in the rhythm or orientation of  
455 a gesture action, hold, or repetition, e.g., the rhythm or direction of an object shake is  
456 broken or changed (Hobaiter & Byrne, 2017).

457 **Intra-observer reliability**

458 Video-based coding offers the opportunity to conduct reliability measures. Intra-observer  
459 reliability was tested by randomizing the order of the videos and re-coding the duration of  
460 the gestures of every ninth clip, for a total of 75 gestures from 23 clips. We performed an  
461 intraclass correlation coefficient (ICC) test – class 3 with  $n=1$  rater (Landers, 2015) – which  
462 revealed very high agreement on gesture duration measurements (ICC=0.995,  $p<.001$ ).

463 Unfortunately, an additional step of inter-observer reliability was not possible due to the  
464 loss of the file that linked the original dataset to the videos from which data were extracted.

465 **Statistical analysis**

466 All data were analysed using R version 4.0.0 and RStudio version 1.2.5042 (R Core Team,  
467 2020; RStudio Team, 2020). We fitted Bayesian generalised linear multivariate multilevel

1  
2  
3 468 models using the ‘brm’ function from the ‘brms’ package (Bürkner, 2017) with minimally  
4  
5 469 informative priors, 2000 iterations and 3 chains.

6  
7  
8 470 We ran a first model testing Zipf’s law of brevity (Zipf-model), containing gesture  
9  
10 471 token duration (s) as the response variable, the proportion of occurrences of a particular  
11  
12 472 gesture type in the dataset (Proportion) as a fixed effect, and gesture Category (manual vs  
13  
14 473 whole-body) as a control. We included signaller ID, sequence ID, and gesture type as  
15  
16 474 random effects. We include Category as a variable here to allow for more direct comparison  
17  
18 475 with previous work, which often excludes or differentiates non-manual signals, either in  
19  
20 476 great ape gesture (Heesen et al., 2019; Rodrigues et al., 2021) or in signed languages and  
21  
22 477 fingerspelling (e.g., Börstell et al., 2016).

23  
24  
25 478 We tested Menzerath’s law by running a second model (Menzerath-model)  
26  
27 479 containing gesture token duration (s) as the response variable, sequence size (number of  
28  
29 480 gesture tokens within the sequence) as a fixed factor, and the proportion of whole-body  
30  
31 481 gestures within the sequence (PWB) as a control. We modelled signaller ID and sequence ID  
32  
33 482 as random factors.

34  
35  
36 483 It was highlighted during the review process that the emergence of Menzerath’s law  
37  
38 484 may be an artifice created by the selection of *fixed*, as opposed to *loose*, duration gesture  
39  
40 485 types when producing longer sequences. To address this hypothesis, we produced  
41  
42 486 histograms depicting the distribution of *loose* and *fixed* duration gestures within sequences  
43  
44 487 at each sequence size. The majority of gesture types (n=20 of total 26), and of gesture  
45  
46 488 tokens (n=456 of total 560) were of the *loose* gesture form, thus there were very few  
47  
48 489 gesture sequences formed only of *fixed* gesture types. However, we further visually  
49  
50 490 assessed the distributions of *fixed* gestures in sequences formed of only *fixed* gestures.  
51  
52  
53  
54  
55  
56  
57  
58  
59  
60

1  
2  
3 491 As our data may be particularly influenced by a single prolific individual (Duane) who  
4  
5  
6 492 contributed around half of the data, we assess the generalizability of our findings by  
7  
8 493 replicating analyses conducted on the full dataset on a subset of the data containing only  
9  
10 494 gestures by Duane as well as on a subset containing all but the prolific individual Duane. For  
11  
12  
13 495 the models testing Duane’s data, signaller ID was removed from the random factors as it  
14  
15 496 was no longer relevant (with the inclusion of only one individual). In order to avoid inflation  
16  
17  
18 497 of the dataset we include date as a random factor; which also allows us to avoid biasing the  
19  
20  
21 498 analysis towards particularly prolific days and control for within-individual consistency.

22  
23 499 We ran full-null model comparisons using the Level One Out information criterion  
24  
25 500 (LOO) (Vehtari et al., 2017) ‘loo\_compare’ function from the ‘stan’ package (version 2.21.5;  
26  
27 501 Stan Development Team, 2022) where Zipf’s null model contained only the control variable  
28  
29  
30 502 Category and the random effects, whereas Menzerath’s null model contained only the  
31  
32  
33 503 control variable PWB and the random effects. Prior to the Bayesian analysis we assessed  
34  
35 504 data distribution using the ‘fitdistr’ package (version 1.0-14; Delignette-Muller & Dutang,  
36  
37 505 2015). Following data inspection, we log-transformed gesture duration and average  
38  
39  
40 506 sequence duration as data from the response variable strongly skewed towards zero (for  
41  
42  
43 507 data inspection see supporting information 2).

44  
45 508 Finally, previous work has frequently employed correlation and compression tests,  
46  
47 509 which looks at whether the expected mean code length observed in the dataset is  
48  
49  
50 510 significantly smaller than a range of mean code lengths calculated via permutations, to test  
51  
52 511 the mathematical theory behind both laws. In addition, we also fitted Bayesian generalised  
53  
54  
55 512 linear multivariate multilevel models with same number of iterations and chains as the  
56  
57 513 previous models but having the median duration of each of the 26 gesture types as  
58  
59 514 response variable, category of gesture as a fixed factor, as well as frequency of that gesture

1  
2  
3 515 type as a predictor. These tests offer limited opportunities to control for potential  
4  
5  
6 516 confounds such as signaller identity and should be interpreted with caution in relatively  
7  
8 517 small and variable datasets. We provide them in the supporting information 6 to allow for  
9  
10  
11 518 comparison with previous work that analysed median durations with or without  
12  
13 519 implementing generalised linear models (e.g., Hernández-Fernández et al. 2019; Watson et  
14  
15 520 al. 2020).

## 19 521 **Data and code**

21 522 Data and code for all analyses are available in a public GitHub repository: [github.com/Wild-](https://github.com/Wild-Minds/LinguisticLaws_Papers)  
22  
23 523 [Minds/LinguisticLaws\\_Papers](https://github.com/Wild-Minds/LinguisticLaws_Papers)

## 27 524 **Acknowledgements**

30 525 We thank the staff and field assistants of the Budongo Conservation Field Station for their  
31  
32 526 assistance in the original gestural data collection, and the Ugandan National Council for  
33  
34  
35 527 Science and Technology and the Ugandan Wildlife Authority for permission to conduct the  
36  
37 528 original research. We thank the Royal Zoological Society of Scotland for its funding of the  
38  
39  
40 529 field station. We thank Dr Alexander Mielke for his advice on the statistical models. We  
41  
42 530 thank the editor and three anonymous reviewers for their constructive comments. This  
43  
44  
45 531 research received funding from the European Union's 8<sup>th</sup> Framework Programme, Horizon  
46  
47 532 2020, under grant agreement no 802719.

## 50 533 **References**

53 534 Altmann, G. (1980). Prolegomena to Menzerath's law. *Glottometrika*, 2, 1–10.

- 1  
2  
3 535 Altmann, G., & Gerlach, M. (2016). Statistical Laws in Linguistics. In M. D. Esposti, Altmann,  
4  
5  
6 536 & F. Pachet (Eds.), *Creativity and Universality in Language* (pp. 7–26). Springer  
7  
8 537 International Publishing. [https://doi.org/10.1007/978-3-319-24403-7\\_2](https://doi.org/10.1007/978-3-319-24403-7_2)  
9  
10 538 Andres, J., Benešová, M., & Langer, J. (2021). Towards a fractal analysis of the sign language.  
11  
12  
13 539 *Journal of Quantitative Linguistics*, 28(1), 77–94.  
14  
15 540 <https://doi.org/10.1080/09296174.2019.1656149>  
16  
17 541 Bard, K. A., Maguire-Herring, V., Tomonaga, M., & Matsuzawa, T. (2019). The gesture  
18  
19  
20 542 ‘Touch’: Does meaning-making develop in chimpanzees’ use of a very flexible  
21  
22  
23 543 gesture? *Animal Cognition*, 22(4), 535–550. <https://doi.org/10.1007/s10071-017->  
24  
25 544 1136-0  
26  
27 545 Bentz, C., & Ferrer-i-Cancho, R. (2016). *Zipf’s law of abbreviation as a language universal*.  
28  
29  
30 546 Leiden workshop on capturing phylogenetic algorithms for linguistics, Leiden,  
31  
32 547 Netherlands. <https://doi.org/10.15496/PUBLIKATION-10057>  
33  
34 548 Boroda, M. G., & Altmann, G. (1991). Menzerath’s law in musical texts. *Musikometrika*, 3, 1–  
35  
36 549 13.  
37  
38  
39 550 Börstell, C., Hörberg, T., & Östling, R. (2016). Distribution and duration of signs and parts of  
40  
41  
42 551 speech in Swedish Sign Language. *Sign Language & Linguistics*, 19(2), 143–196.  
43  
44 552 <https://doi.org/10.1075/sll.19.2.01bor>  
45  
46 553 Bürkner, P.-C. (2017). **brms**: An R Package for Bayesian Multilevel Models Using Stan.  
47  
48  
49 554 *Journal of Statistical Software*, 80(1). <https://doi.org/10.18637/jss.v080.i01>  
50  
51 555 Byrne, R. W., Cartmill, E., Genty, E., Graham, K. E., Hobaiter, C., & Tanner, J. (2017). Great  
52  
53  
54 556 ape gestures: Intentional communication with a rich set of innate signals. *Animal*  
55  
56 557 *Cognition*, 20(4), 755–769. <https://doi.org/10.1007/s10071-017-1096-4>  
58  
59  
60



- 1  
2  
3 558 Call, J., & Tomasello, M. (Eds.). (2007). *The gestural communication of apes and monkeys*.  
4  
5  
6 559 Lawrence Erlbaum Associates, Publishers.  
7  
8 560 Chaabouni, R., Kharitonov, E., Dupoux, E., & Baroni, M. (2019). *Anti-efficient encoding in*  
9  
10 561 *emergent communication*. 33rd Conference on Neural Information Processing  
11  
12 562 Systems (NeurIPS 2019), Vancouver, Canada.  
13  
14 563 Clark, C. B. (1977). A preliminary report on weaning among chimpanzees of the Gombe  
15  
16 564 National Park, Tanzania. In S. Chevalier-Skolnikoff & F. E. Poirier (Eds.), *Primate Bio-*  
17  
18 565 *social Development: Biological, Social and Ecological Determinants*. (pp. 235–260).  
19  
20 566 Garland.  
21  
22 567 Clink, D. J., Ahmad, A. H., & Klinck, H. (2020). Brevity is not a universal in animal  
23  
24 568 communication: Evidence for compression depends on the unit of analysis in small  
25  
26 569 ape vocalizations. *Royal Society Open Science*, 7(4), 200151.  
27  
28 570 <https://doi.org/10.1098/rsos.200151>  
29  
30 571 Cover, T. M., & Thomas, J. A. (2006). *Elements of information theory* (2nd ed). Wiley-  
31  
32 572 Interscience.  
33  
34 573 Delignette-Muller, M. L., & Dutang, C. (2015). {fitdistrplus}: An {R} Package for Fitting  
35  
36 574 Distributions. *Journal of Statistical Software*, 64(4), 1–34.  
37  
38 575 Demartsev, V., Gordon, N., Barocas, A., Bar-Ziv, E., Ilany, T., Goll, Y., Ilany, A., & Geffen, E.  
39  
40 576 (2019). The “Law of Brevity” in animal communication: Sex-specific signaling  
41  
42 577 optimization is determined by call amplitude rather than duration. *Evolution Letters*,  
43  
44 578 3(6), 623–634. <https://doi.org/10.1002/evl3.147>  
45  
46 579 Favaro, L., Gamba, M., Cresta, E., Fumagalli, E., Bandoli, F., Pilenga, C., Isaja, V., Mathevon,  
47  
48 580 N., & Reby, D. (2020). Do penguins’ vocal sequences conform to linguistic laws?  
49  
50 581 *Biology Letters*, 16(2), 20190589. <https://doi.org/10.1098/rsbl.2019.0589>  
51  
52  
53  
54  
55  
56  
57  
58  
59  
60

- 1  
2  
3 582 Fawcett, K., & Muhumuza, G. (2000). Death of a wild chimpanzee community member:  
4  
5  
6 583 Possible outcome of intense sexual competition. *American Journal of Primatology*,  
7  
8 584 51(4), 243–247. [https://doi.org/10.1002/1098-2345\(200008\)51:4<243::AID-](https://doi.org/10.1002/1098-2345(200008)51:4<243::AID-)  
9  
10 585 [AJP3>3.0.CO;2-P](https://doi.org/10.1002/1098-2345(200008)51:4<243::AID-AJP3>3.0.CO;2-P)  
11  
12  
13 586 Fedurek, P., Zuberbühler, K., & Semple, S. (2017). Trade-offs in the production of animal  
14  
15 587 vocal sequences: Insights from the structure of wild chimpanzee pant hoots.  
16  
17 588 *Frontiers in Zoology*, 14(1), 50. <https://doi.org/10.1186/s12983-017-0235-8>  
18  
19  
20 589 Ferrer-i-Cancho, R., Bentz, C., & Seguin, C. (2022). Optimal coding and the origins of Zipfian  
21  
22 590 laws. *Journal of Quantitative Linguistics*, 29(2), 165–194.  
23  
24 591 <https://doi.org/10.1080/09296174.2020.1778387>  
25  
26  
27 592 Ferrer-i-Cancho, R., & Forns, N. (2009). The self-organization of genomes. *Complexity*, 15(5),  
28  
29 593 34-36. <https://doi.org/10.1002/cplx.20296>  
30  
31  
32 594 Ferrer-i-Cancho, R., & Hernández-Fernández, A. (2013). The failure of the law of brevity in  
33  
34 595 two new world primates. Statistical Caveats. *Glottology*, 4(1), 45-55.  
35  
36 596 <https://doi.org/10.1524/glot.2013.0004>  
37  
38  
39 597 Ferrer-i-Cancho, R., Hernández-Fernández, A., Baixeries, J., Dębowski, Ł., & Mačutek, J.  
40  
41 598 (2014). When is Menzerath-Altmann law mathematically trivial? A new approach.  
42  
43 599 *Statistical Applications in Genetics and Molecular Biology*, 13(6), 633-644.  
44  
45 600 <https://doi.org/10.1515/sagmb-2013-0034>  
46  
47  
48 601 Ferrer-i-Cancho, R., Hernández-Fernández, A., Lusseau, D., Agoramoorthy, G., Hsu, M. J., &  
49  
50 602 Semple, S. (2013). Compression as a universal principle of animal behavior. *Cognitive*  
51  
52 603 *Science*, 37(8), 1565–1578. <https://doi.org/10.1111/cogs.12061>  
53  
54  
55 604 Ferrer-i-Cancho, R., & Lusseau, D. (2009). Efficient coding in dolphin surface behavioral  
56  
57 605 patterns. *Complexity*, 14(5), 23–25. <https://doi.org/10.1002/cplx.20266>  
58  
59  
60

- 1  
2  
3 606 Ferrer-i-Cancho, R., Lusseau, D., & McCowan, B. (2022). Parallels of human language in the  
4  
5 behavior of bottlenose dolphins. *Linguistic Frontiers*, 5(1), 1-7.  
6 607  
7  
8 608 <https://doi.org/10.2478/lf-2022-0002>  
9  
10 609 Fitch, W. T., de Boer, B., Mathur, N., & Ghazanfar, A. A. (2016). Monkey vocal tracts are  
11  
12 speech-ready. *Science Advances*, 2(12), e1600723.  
13 610  
14  
15 611 <https://doi.org/10.1126/sciadv.1600723>  
16  
17 612 Graham, K. E., Badihi, G., Safryghin, A., Grund, C., & Hobaiter, C. (2022). A socio-ecological  
18  
19 perspective on the gestural communication of great ape species, individuals, and  
20 613  
21 social units. *Ethology Ecology & Evolution*, 34(3), 235–259.  
22 614  
23  
24 615 <https://doi.org/10.1080/03949370.2021.1988722>  
25  
26 616 Graham, K. E., Hobaiter, C., Ounsley, J., Furuichi, T., & Byrne, R. W. (2018). Bonobo and  
27  
28 chimpanzee gestures overlap extensively in meaning. *PLOS Biology*, 16(2), e2004825.  
29 617  
30  
31 618 <https://doi.org/10.1371/journal.pbio.2004825>  
32  
33 619 Gustison, M. L., Semple, S., Ferrer-i-Cancho, R., & Bergman, T. J. (2016). Gelada vocal  
34  
35 sequences follow Menzerath’s linguistic law. *Proceedings of the National Academy of*  
36 620  
37 *Sciences*, 113(19), E2750–E2758. <https://doi.org/10.1073/pnas.1522072113>  
38 621  
39  
40 622 Hatzigeorgiu, N., Mikros, G., & Carayannis, G. (2001). Word length, word frequencies and  
41  
42 Zipf’s law in the greek language. *Journal of Quantitative Linguistics*, 8(3), 175–185.  
43 623  
44  
45 624 <https://doi.org/10.1076/jqul.8.3.175.4096>  
46  
47 625 Heesen, R., Hobaiter, C., Ferrer-i-Cancho, R., & Semple, S. (2019). Linguistic laws in  
48  
49 chimpanzee gestural communication. *Proceedings of the Royal Society B: Biological*  
50 626  
51 *Sciences*, 286(1896), 20182900. <https://doi.org/10.1098/rspb.2018.2900>  
52 627  
53  
54 628 Held, S. D. E., & Špinka, M. (2011). Animal play and animal welfare. *Animal Behaviour*, 81(5),  
55  
56 891–899. <https://doi.org/10.1016/j.anbehav.2011.01.007>  
57 629  
58  
59  
60

1  
2  
3  
4  
5  
6  
7  
8  
9  
10  
11  
12  
13  
14  
15  
16  
17  
18  
19  
20  
21  
22  
23  
24  
25  
26  
27  
28  
29  
30  
31  
32  
33  
34  
35  
36  
37  
38  
39  
40  
41  
42  
43  
44  
45  
46  
47  
48  
49  
50  
51  
52  
53  
54  
55  
56  
57  
58  
59  
60

630 Hernández-Fernández, A., G. Torre, I., Garrido, J.-M., & Lacasa, L. (2019). Linguistic laws in  
631 speech: The case of Catalan and Spanish. *Entropy*, *21*(12), 1153.  
632 <https://doi.org/10.3390/e21121153>

633 Hobaiter, C., & Byrne, R. W. (2011a). The gestural repertoire of the wild chimpanzee. *Animal*  
634 *Cognition*, *14*(5), 745–767. <https://doi.org/10.1007/s10071-011-0409-2>

635 Hobaiter, C., & Byrne, R. W. (2011b). Serial gesturing by wild chimpanzees: Its nature and  
636 function for communication. *Animal Cognition*, *14*(6), 827–838.  
637 <https://doi.org/10.1007/s10071-011-0416-3>

638 Hobaiter, C., & Byrne, R. W. (2012). Gesture use in consortship: Wild chimpanzees’ use of  
639 gesture for an ‘evolutionarily urgent’ purpose. In S. Pika & K. Liebal (Eds.), *Gesture*  
640 *Studies* (Vol. 6, pp. 129–146). John Benjamins Publishing Company.  
641 <https://doi.org/10.1075/g6.08hob>

642 Hobaiter, C., & Byrne, R. W. (2014). The meanings of chimpanzee gestures. *Current Biology*,  
643 *24*(14), 1596–1600. <https://doi.org/10.1016/j.cub.2014.05.066>

644 Hobaiter, C., Byrne, R. W., & Zuberbühler, K. (2017). Wild chimpanzees’ use of single and  
645 combined vocal and gestural signals. *Behavioral Ecology and Sociobiology*, *71*(6), 96.  
646 <https://doi.org/10.1007/s00265-017-2325-1>

647 Huang, M., Ma, H., Ma, C., Garber, P. A., & Fan, P. (2020). Male gibbon loud morning calls  
648 conform to Zipf’s law of brevity and Menzerath’s law: Insights into the origin of  
649 human language. *Animal Behaviour*, *160*, 145–155.  
650 <https://doi.org/10.1016/j.anbehav.2019.11.017>

651 Janik, V. M., & Slater, P. J. B. (1997). Vocal Learning in Mammals. In *Advances in the Study of*  
652 *Behavior* (Vol. 26, pp. 59–99). Elsevier. [https://doi.org/10.1016/S0065-](https://doi.org/10.1016/S0065-3454(08)60377-0)  
653 [3454\(08\)60377-0](https://doi.org/10.1016/S0065-3454(08)60377-0)

- 1  
2  
3 654 Kanwal, J., Smith, K., Culbertson, J., & Kirby, S. (2017). Zipf's law of abbreviation and the  
4  
5 principle of least effort: Language users optimise a miniature lexicon for efficient  
6 655  
7  
8 656 communication. *Cognition*, 165, 45–52.  
9  
10 657 <https://doi.org/10.1016/j.cognition.2017.05.001>  
11  
12  
13 658 Kendon, A. (2004). *Gesture: Visible Action as Utterance*. Cambridge University Press.  
14  
15 659 <https://doi.org/10.1017/CBO9780511807572>  
16  
17  
18 660 Köhler, R. (2012). *Quantitative syntax analysis*. De Gruyter Mouton.  
19  
20 661 Köhler, R., Altmann, G., & Piotrowski, R. G. (Eds.). (2005). *Quantitative Linguistik /*  
21  
22 *Quantitative Linguistics: Ein internationales Handbuch / An International Handbook*.  
23 662  
24 De Gruyter Mouton. <https://doi.org/10.1515/9783110155785>  
25 663  
26  
27 664 Landers, R. (2015). Computing intraclass correlations (ICC) as estimates of interrater  
28  
29 reliability in SPSS [Data set]. In *The Winnower* (Vol. 2, p. e143518).  
30 665  
31 <https://doi.org/10.15200/winn.143518.81744>  
32 666  
33  
34 667 Li, W. (2012). Menzerath's law at the gene-exon level in the human genome. *Complexity*,  
35  
36 668 17(4), 49–53. <https://doi.org/10.1002/cplx.20398>  
37  
38  
39 669 Liebal, K., Call, J., Tomasello, M., & Pika, S. (2004). To move or not to move: How apes adjust  
40  
41 to the attentional state of others. *Interaction Studies. Social Behaviour and*  
42 670  
43 *Communication in Biological and Artificial Systems*, 5(2), 199–219.  
44 671  
45 <https://doi.org/10.1075/is.5.2.03lie>  
46 672  
47  
48  
49 673 Luo, B., Jiang, T., Liu, Y., Wang, J., Lin, A., Wei, X., & Feng, J. (2013). Brevity is prevalent in  
50  
51 bat short-range communication. *Journal of Comparative Physiology A*, 199(4), 325–  
52 674  
53 333. <https://doi.org/10.1007/s00359-013-0793-y>  
54 675  
55  
56  
57 676 Menzerath, P. (1954). *Die Architektonik des deutschen Wortschatzes: Vol. Volume 3. F.*  
58  
59 677 Dümmler.

- 1  
2  
3 678 Miton, H., & Morin, O. (2019). When iconicity stands in the way of abbreviation: No Zipfian  
4  
5 effect for figurative signals. *PLOS ONE*, 14(8), e0220793.  
6 679  
7  
8 680 <https://doi.org/10.1371/journal.pone.0220793>  
9  
10 681 Muller, M. N., & Wrangham, R. W. (Eds.). (2009). *Sexual coercion in primates and humans:*  
11  
12 *An evolutionary perspective on male aggression against females*. Harvard University  
13 682  
14 Press.  
15 683  
16  
17 684 Naranan, S., & Balasubrahmanyam, V. K. (2000). Information theory and algorithmic  
18  
19 complexity: applications to linguistic discourses and DNA sequences as complex  
20 685  
21 systems part I: Efficiency of the genetic code of DNA. *Journal of Quantitative*  
22 686  
23 *Linguistics*, 7(2), 129–151. [https://doi.org/10.1076/0929-6174\(200008\)07:02;1-](https://doi.org/10.1076/0929-6174(200008)07:02;1-)  
24 687  
25 [Z;FT129](https://doi.org/10.1076/0929-6174(200008)07:02;1-Z;FT129)  
26 688  
27  
28 689 Newton-Fisher, N. E., Thompson, M. E., Reynolds, V., Boesch, C., & Vigilant, L. (2009).  
29  
30 Paternity and social rank in wild chimpanzees (*Pan troglodytes*) from the Budongo  
31 690  
32 Forest, Uganda. *American Journal of Physical Anthropology*, 142(3), 417–428.  
33 691  
34  
35 692 <https://doi.org/10.1002/ajpa.21241>  
36 693  
37  
38 694 Nishida, T. (1980). The leaf-clipping display: A newly-discovered expressive gesture in wild  
39  
40 chimpanzees. *Journal of Human Evolution*, 9(2), 117–128.  
41 695  
42  
43 [https://doi.org/10.1016/0047-2484\(80\)90068-8](https://doi.org/10.1016/0047-2484(80)90068-8)  
44 696  
45  
46 697 Nishida, T. (Ed.). (2010). *Chimpanzee behavior in the wild: An audio-visual encyclopedia*.  
47  
48 Springer.  
49 698  
50  
51 699 Pellis, S. M., & Pellis, V. C. (1996). On knowing it's only play: The role of play signals in play  
52  
53 fighting. *Aggression and Violent Behavior*, 1(3), 249–268.  
54 700  
55  
56 [https://doi.org/10.1016/1359-1789\(95\)00016-X](https://doi.org/10.1016/1359-1789(95)00016-X)  
57  
58  
59  
60

- 1  
2  
3 701 R Core Team. (2020). *R: A Language and Environment for Statistical Computing* (4.0.0) [R]. R  
4  
5 702 Foundation for Statistical Computing. <https://www.R-project.org/>  
6  
7  
8 703 Rodrigues, E. D., Santos, A. J., Veppo, F., Pereira, J., & Hobaiter, C. (2021). Connecting  
9  
10 704 primate gesture to the evolutionary roots of language: A systematic review.  
11  
12 705 *American Journal of Primatology*, 83(9). <https://doi.org/10.1002/ajp.23313>  
13  
14  
15 706 RStudio Team. (2020). *RStudio: Integrated Development Environment for R* (1.2.5042) [R].  
16  
17 707 RStudio, Inc. <http://www.rstudio.com/>  
18  
19  
20 708 Rujević, B., Kaplar, M., Kaplar, S., Stanković, R., Obradović, I., & Mačutek, J. (2021).  
21  
22 709 Quantitative analysis of syllable properties in Croatian, Serbian, Russian, and  
23  
24 710 Ukrainian. In A. Pawłowski, J. Mačutek, S. Embleton, & G. Mikros (Eds.), *Current*  
25  
26 711 *Issues in Linguistic Theory* (Vol. 356, pp. 56–67). John Benjamins Publishing  
27  
28 712 Company. <https://doi.org/10.1075/cilt.356.04ruj>  
29  
30  
31  
32 713 Sanada, H. (2008). *Investigations in Japanese historical lexicology* (Rev. ed). Peust &  
33  
34 714 Gutschmidt.  
35  
36  
37 715 Schel, A. M., Townsend, S. W., Machanda, Z., Zuberbühler, K., & Slocombe, K. E. (2013).  
38  
39 716 Chimpanzee alarm call Production meets key criteria for intentionality. *PLoS ONE*,  
40  
41 717 8(10), e76674. <https://doi.org/10.1371/journal.pone.0076674>  
42  
43  
44  
45 718 Scott, C. B. (2008). *A primer for the exercise and nutrition sciences: Thermodynamics,*  
46  
47 719 *bioenergetics, metabolism*. Springer.  
48  
49  
50 720 Semple, S., Ferrer-i-Cancho, R., & Gustison, M. L. (2022). Linguistic laws in biology. *Trends in*  
51  
52 721 *Ecology & Evolution*, 37(1), 53–66. <https://doi.org/10.1016/j.tree.2021.08.012>  
53  
54  
55 722 Semple, S., Hsu, M. J., Agoramoorthy, G., & Ferrer-i-Cancho, R. (2013). The law of brevity in  
56  
57 723 macaque vocal communication is not an artefact of analysing mean call durations.  
58  
59  
60

1  
2  
3 724 *Journal of Quantitative Linguistics*, 20(3), 209–217.  
4  
5  
6 725 <https://doi.org/10.1080/09296174.2013.799917>  
7  
8 726 Smith, E. (2014). *Social Play in Primates*. Elsevier Science.  
9  
10 727 <http://qut.eblib.com.au/patron/FullRecord.aspx?p=1172757>  
11  
12  
13 728 Sokal, R. R., & Rohlf, F. J. (1995). *Biometry: The principles and practice of statistics in*  
14  
15 729 *biological research* (3rd ed). W.H. Freeman.  
16  
17  
18 730 Stan Development Team. (2022). “RStan: The R interface to Stan.” (2.21.5) [R]. [https://mc-](https://mc-stan.org/)  
19  
20 731 [stan.org/](https://mc-stan.org/).  
21  
22  
23 732 Strauss, U., Grzybek, P., & Altmann, G. (2007). Word Length and Word Frequency. In P.  
24  
25 733 Grzybek (Ed.), *Contributions to the Science of Text and Language* (Vol. 31, pp. 277–  
26  
27 734 294). Springer Netherlands. [https://doi.org/10.1007/978-1-4020-4068-9\\_13](https://doi.org/10.1007/978-1-4020-4068-9_13)  
28  
29  
30 735 Thompson, M. E. (2013). Reproductive ecology of female chimpanzees: Chimpanzee  
31  
32 736 reproductive ecology. *American Journal of Primatology*, 75(3), 222–237.  
33  
34 737 <https://doi.org/10.1002/ajp.22084>  
35  
36  
37 738 Tutin, C. E. G. (1979). Mating patterns and reproductive strategies in a community of wild  
38  
39 739 chimpanzees (*Pan troglodytes schweinfurthii*). *Behavioral Ecology and Sociobiology*,  
40  
41 740 6(1), 29–38. <https://doi.org/10.1007/BF00293242>  
42  
43  
44 741 Valente, D., De Gregorio, C., Favaro, L., Friard, O., Miaretsoa, L., Raimondi, T., Ratsimbazafy,  
45  
46 742 J., Torti, V., Zanolli, A., Giacoma, C., & Gamba, M. (2021). Linguistic laws of brevity:  
47  
48 743 Conformity in *Indri indri*. *Animal Cognition*, 24(4), 897–906.  
49  
50 744 <https://doi.org/10.1007/s10071-021-01495-3>  
51  
52  
53 745 Vehtari, A., Gelman, A., & Gabry, J. (2017). Practical Bayesian model evaluation using leave-  
54  
55 746 one-out cross-validation and WAIC. *Statistics and Computing*, 27(5), 1413–1432.  
56  
57 747 <https://doi.org/10.1007/s11222-016-9696-4>  
58  
59  
60



- 1  
2  
3 748 Wang, Y., & Chen, X. (2015). Structural Complexity of Simplified Chinese Characters. In A.  
4  
5 749 Tuzzi, M. Benesová, & J. Macutek (Eds.), *Recent Contributions to Quantitative*  
6  
7 750 *Linguistics*. DE GRUYTER. <https://doi.org/10.1515/9783110420296-019>  
8  
9  
10 751 Watson, S. K., Heesen, R., Hedwig, D., Robbins, M. M., & Townsend, S. W. (2020). An  
11  
12 752 exploration of Menzerath's law in wild mountain gorilla vocal sequences. *Biology*  
13  
14 753 *Letters*, 16(10), 20200380. <https://doi.org/10.1098/rsbl.2020.0380>  
15  
16  
17 754 Watts, D. P. (2015). Mating behavior of adolescent male chimpanzees (*Pan troglodytes*) at  
18  
19 755 Ngogo, Kibale National Park, Uganda. *Primates*, 56(2), 163–172.  
20  
21 756 <https://doi.org/10.1007/s10329-014-0453-z>  
22  
23  
24 757 Wilson, M. L., Boesch, C., Fruth, B., Furuichi, T., Gilby, I. C., Hashimoto, C., Hobaiter, C. L.,  
25  
26 758 Hohmann, G., Itoh, N., Koops, K., Lloyd, J. N., Matsuzawa, T., Mitani, J. C., Mjungu, D.  
27  
28 759 C., Morgan, D., Muller, M. N., Mundry, R., Nakamura, M., Pruettz, J., ... Wrangham, R.  
29  
30 760 W. (2014). Lethal aggression in *Pan* is better explained by adaptive strategies than  
31  
32 761 human impacts. *Nature*, 513(7518), 414–417. <https://doi.org/10.1038/nature13727>  
33  
34  
35 762 Zipf, G. K. (1936). *The psycho-biology of language: An introduction to dynamic philology*.  
36  
37 763 Routledge.  
38  
39 764 Zipf, G. K. (1949). *Human behavior and the principle of least effort: An introduction to*  
40  
41 765 *human ecology*. Addison-Wesley Press.  
42  
43  
44  
45  
46  
47  
48  
49  
50  
51  
52  
53  
54  
55  
56  
57  
58  
59  
60

1  
2  
3  
4  
5  
6  
7  
8  
9  
10  
11  
12  
13  
14  
15  
16  
17  
18  
19  
20  
21  
22  
23  
24  
25  
26  
27  
28  
29  
30  
31  
32  
33  
34  
35  
36  
37  
38  
39  
40  
41  
42  
43  
44  
45  
46  
47  
48  
49  
50  
51  
52  
53  
54  
55  
56  
57  
58  
59  
60

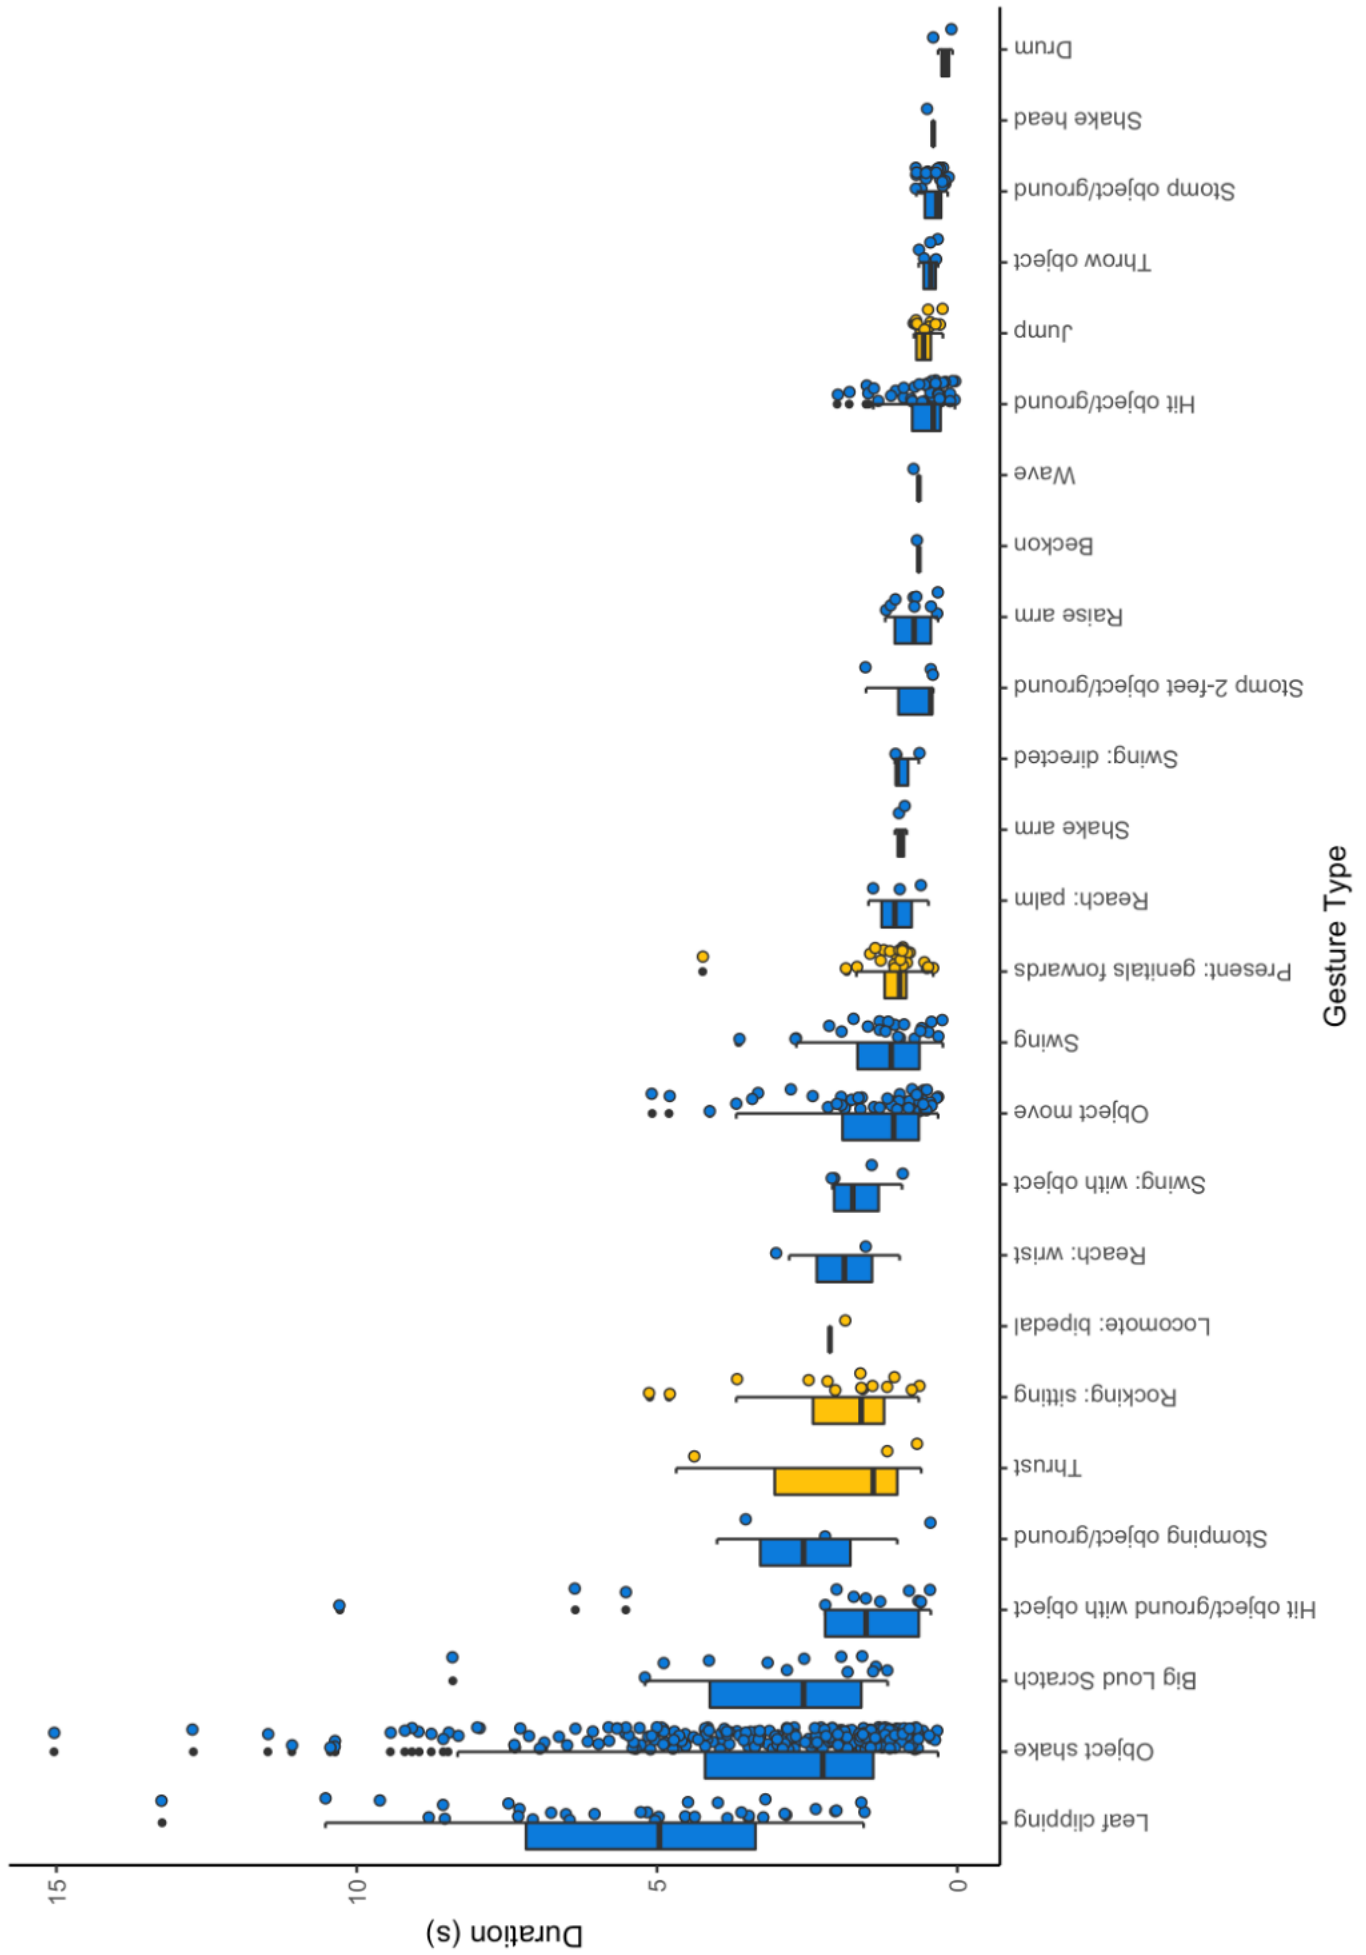

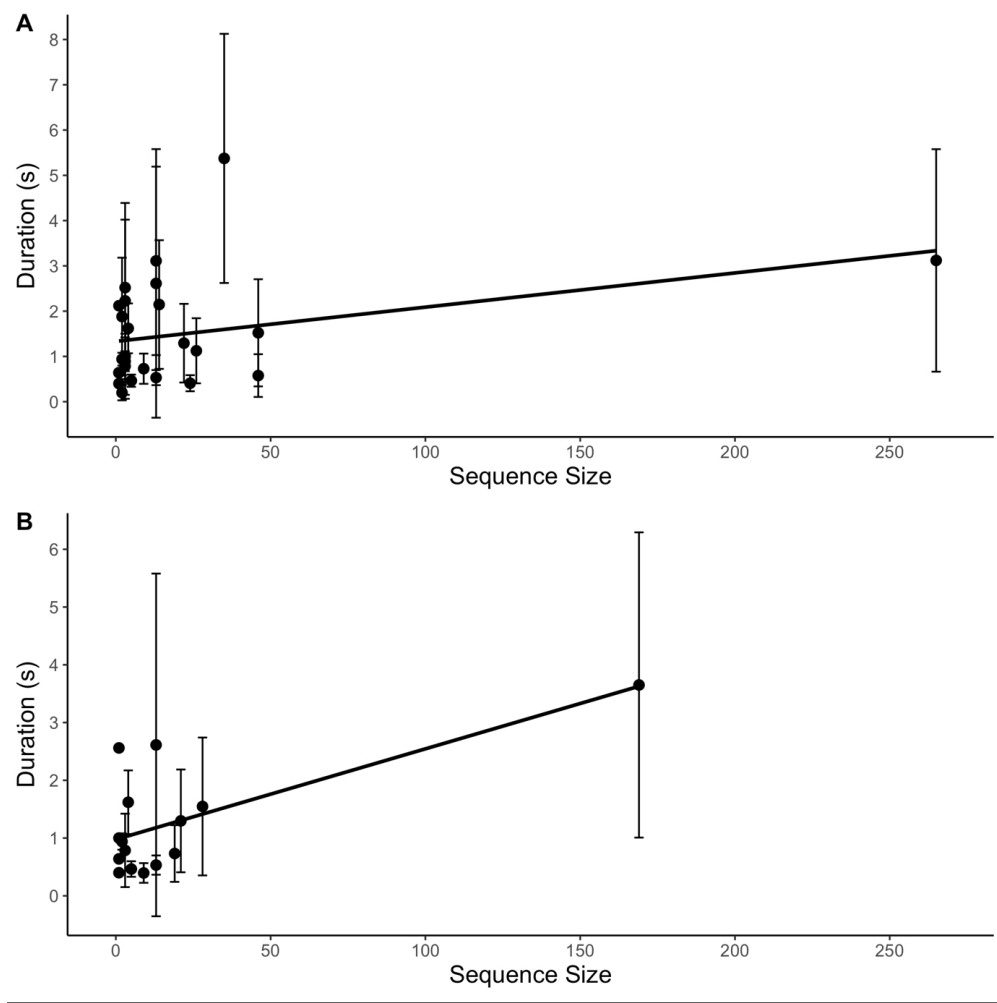

Figure 2. Relationship between frequency of occurrence and gesture duration for the full dataset (A) and Duane only data (B). Points represent the mean duration of each gesture type, with error bars showing the standard deviation from the mean. Black line indicates regression slope.

159x159mm (220 x 220 DPI)

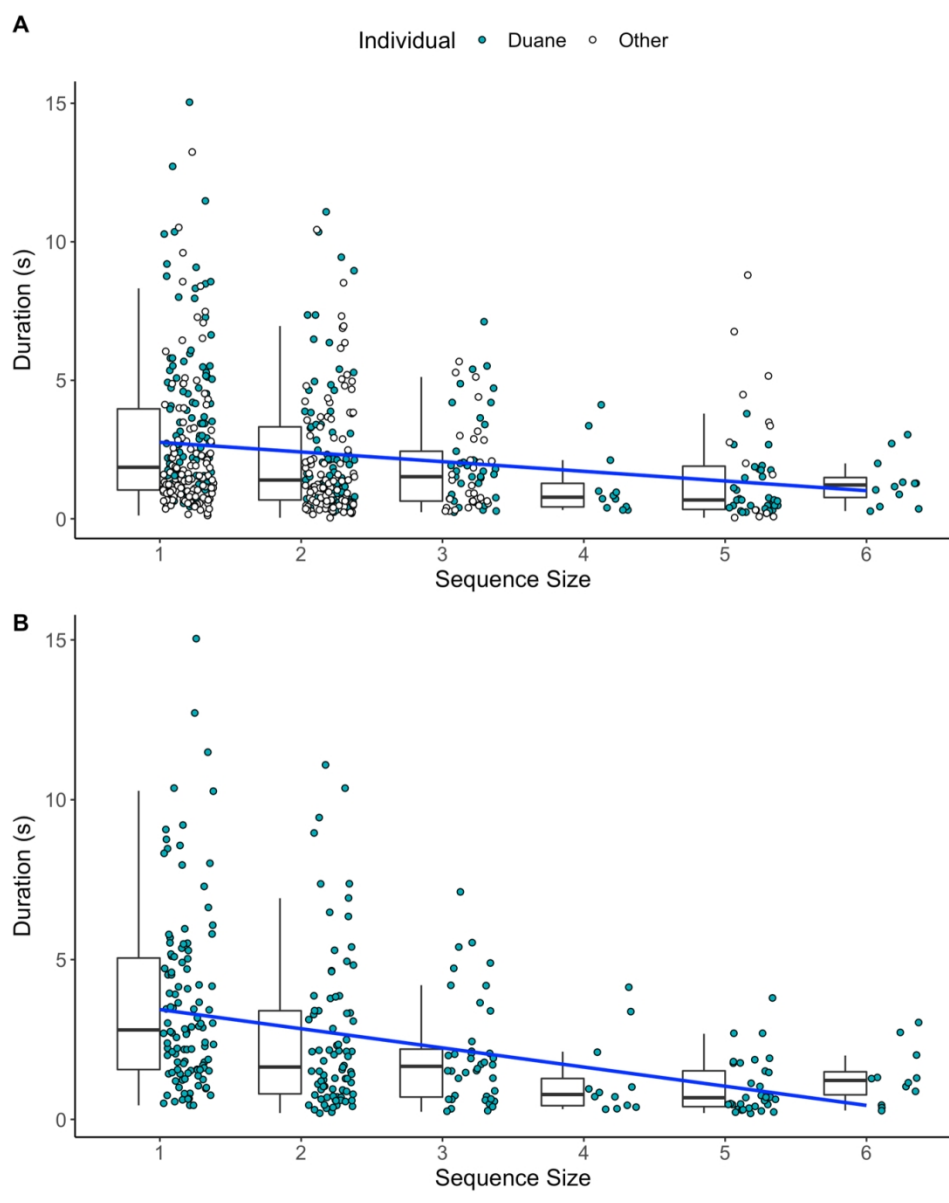

Figure 3. Relationship between sequence size and gesture duration for the full dataset (A) and Duane only data (B). Boxplots represent the median (black bar), the interquartile range – IQR (boxes), and maximum and minimum values excluding outliers (whiskers). Points represent individual gesture tokens, ordered by the length of the sequence they were performed in. Gestural tokens belonging to the individual Duane are indicated in light blue. White circles indicate gesture tokens belonging to all other individuals. Blue line indicates regression slope.

159x199mm (220 x 220 DPI)

**Table 1**

| <b>Sequence length</b> | <b><i>Same type</i></b> | <b><i>Different types</i></b> | <b><i>Total number of sequences</i></b> |
|------------------------|-------------------------|-------------------------------|-----------------------------------------|
| 1                      | NA                      | NA                            | 244                                     |
| 2                      | 24                      | 58                            | 82                                      |
| 3                      | 1                       | 20                            | 21                                      |
| 4                      | 0                       | 3                             | 3                                       |
| 5                      | 1                       | 6                             | 7                                       |
| 6                      | 0                       | 2                             | 2                                       |
| Total                  | 26                      | 89                            |                                         |

## Supporting information 1 – Gesture types definitions

**Table S1. Ethogram of the 26 gesture types recorded in the dataset. Definitions are taken from (Hobaiter & Byrne, 2011a) and (Nishida, 2010). Video examples and illustrations of these gestures are available at [www.greatapedictionary.com](http://www.greatapedictionary.com)**

| Gesture                       | Description                                                                                                                                           | Type   |
|-------------------------------|-------------------------------------------------------------------------------------------------------------------------------------------------------|--------|
| Beckon                        | Hand is moved in an upwards sweep from the elbow or wrist towards signaller.                                                                          | Manual |
| Big loud scratch              | Loud exaggerated scratching movement on the signaller's own body.                                                                                     | Manual |
| Drum                          | Short hard audible contact of alternate palms against an object, usually tree roots.                                                                  | Manual |
| Hit object/ground             | Movement of whole arm, with short hard audible contact of closed fist to an object or the ground. Includes gestures performed with one and both arms. | Manual |
| Hit object/ground with object | As 'hit object/ground' but the signaller holds an object in the hand/hands, which contacts the ground.                                                | Manual |
| Jump                          | While bipedal, both feet leave the ground simultaneously, accompanied by horizontal displacement through the air.                                     | Body   |
| Leaf clipping                 | Strips are torn from a leaf (or leaves) held in the hand using the teeth; produces a conspicuous sound.                                               | Manual |
| Locomote: bipedal             | The signaller walks bipedally while standing up.                                                                                                      | Body   |
| Object move                   | Object is displaced in one direction, contact is maintained throughout movement. Includes gestures performed with one or both hands.                  | Manual |
| Object shake                  | Repeated back and forth movement of an object, usually stem of shrub, branch of tree or woody vine, performed with either one or both hands.          | Manual |
| Present: genitals forwards    | Signaller shows genitals to recipient.                                                                                                                | Body   |
| Raise arm                     | Raise arm and/or hand vertically in the air and direct palm to companion.                                                                             | Manual |

|                            |                                                                                                                                                                                                |        |
|----------------------------|------------------------------------------------------------------------------------------------------------------------------------------------------------------------------------------------|--------|
| Reach: palm                | Arm extended to the recipient with the palm exposed. Typically held up or to the side, although very occasionally down. It is the palm or tip of the fingers that is closest to the recipient. | Manual |
| Reach: wrist               | Arm extended to the recipient with the palm sheltered (fingers are curled), and it is either the wrist, or the back of the fingers that is reached out to the recipient.                       | Manual |
| Rocking: sitting           | Slight or vigorous side to side movements of the body when the signaller is sitting.                                                                                                           | Body   |
| Shake arm                  | Small, repeated shake (adduct or abduct) of horizontally held arm at another. Includes gestures performed with either one or both arms.                                                        | Manual |
| Shake head                 | Small repeated back and forth motion of the head.                                                                                                                                              | Manual |
| Stomp 2-feet object/ground | As 'stomp object/ground' but performed with both feet.                                                                                                                                         | Manual |
| Stomp object/ground        | Sole of the foot is lifted vertically and brought into a short hard audible contact with the surface being stood upon (e.g., ground, branch).                                                  | Manual |
| Stomping object/ground     | As 'stomp object/ground' but performed repeatedly.                                                                                                                                             | Manual |
| Swing                      | Large back and forth movement of the arm held below the shoulder, or of leg from the hip. Includes gestures performed with one and two arms.                                                   | Manual |
| Swing: directed            | As 'swing' but the direction of the swing indicates the direction of desired movement, immediately followed by the recipient moving as indicated.                                              | Manual |
| Swing: with object         | As 'swing' but the signaller holds an object in their hand/hands (e.g., branch, leaves, etc).                                                                                                  | Manual |
| Throw object               | Object is moved and released so that there is displacement through the air after the moment of release.                                                                                        | Manual |
| Thrust                     | Rhythmic back and forth movements of the pelvis.                                                                                                                                               | Body   |
| Wave                       | Large repeated back and forth movement of the arm raised above the shoulder.                                                                                                                   | Manual |

## 2 Supporting information 2 - Duration distribution analysis

3 Before performing the GLMM analysis we analysed the distribution of the gesture  
4 duration data by (1) visually inspecting its empirical density and cumulative distribution  
5 (Figure S4) and (2) assessing its skewness and kurtosis via the visual inspection of the Cullen  
6 and Frey graph (Figure S5). Figure S5 shows the data are skewed towards low values, as  
7 almost half of the data lays between 0 and 3 seconds. Further, we fitted three theoretical  
8 distributions to the data – namely Weibull, Gamma, and Lognormal – and compared  
9 loglikelihood values (Table S2). We then plotted the three distributions and visually  
10 inspected the Q-Q, P-P, and histogram density plots (Figure S6). Finally, we compared  
11 Weibull, Gamma, and Lognormal distributions against gesture duration data distribution via  
12 goodness-of-fit tests and goodness-of-fit information criterion (Table S3 and S4), which  
13 helped identify the lognormal distribution as the best fitting one. Therefore, we proceeded  
14 with log-transforming the duration variable to best fit model assumptions.

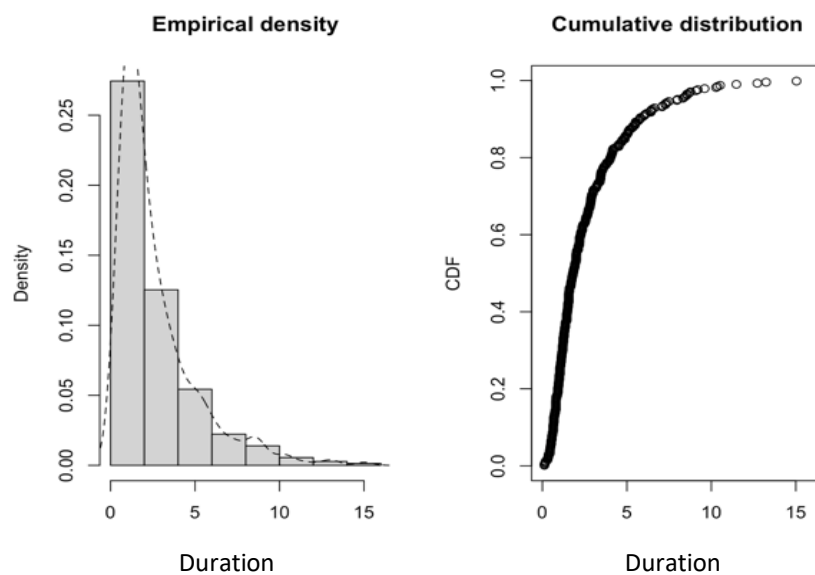

15 **Figure S1. Empirical distribution of gesture duration.**



16 Histogram and empirical cumulative distribution function (CDF) plots representing the  
 17 distribution of gesture duration. Histogram bars represent sample distribution, dashed line  
 18 indicates empirical density.

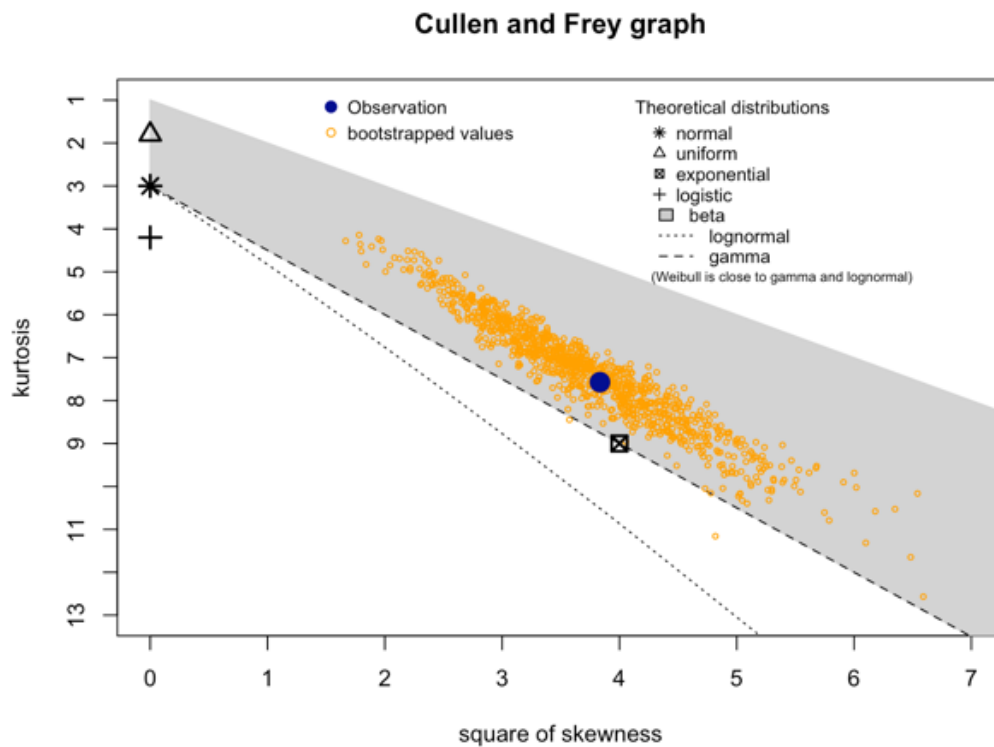

19 **Figure S2. Cullen and Frey graph for gesture duration.** The graph depicts the distribution of  
 20 the skewness and kurtosis of gesture duration data with bootstrapped values, plotted  
 21 against other theoretical distributions, namely normal, uniform, exponential, logistic, beta,  
 22 lognormal, and gamma.

**Table S2. Estimate and standard error for fitting the parameters of three theoretical distributions to the distribution of the gesture duration data.**

| Distribution | Parameters | Estimate  | Std Error  | Loglikelihood |
|--------------|------------|-----------|------------|---------------|
| Weibull      | Shape      | 1.229711  | 0.04786805 | -695.5846     |
|              | Scale      | 2.848181  | 0.12958597 |               |
| Gamma        | Shape      | 1.5695397 | 0.10700744 | -688.7789     |
|              | Rate       | 0.5933806 | 0.04755517 |               |
| Lognormal    | meanlog    | 0.6214851 | 0.04530977 | -677.7389     |
|              | sdlog      | 0.8584975 | 0.03203865 |               |

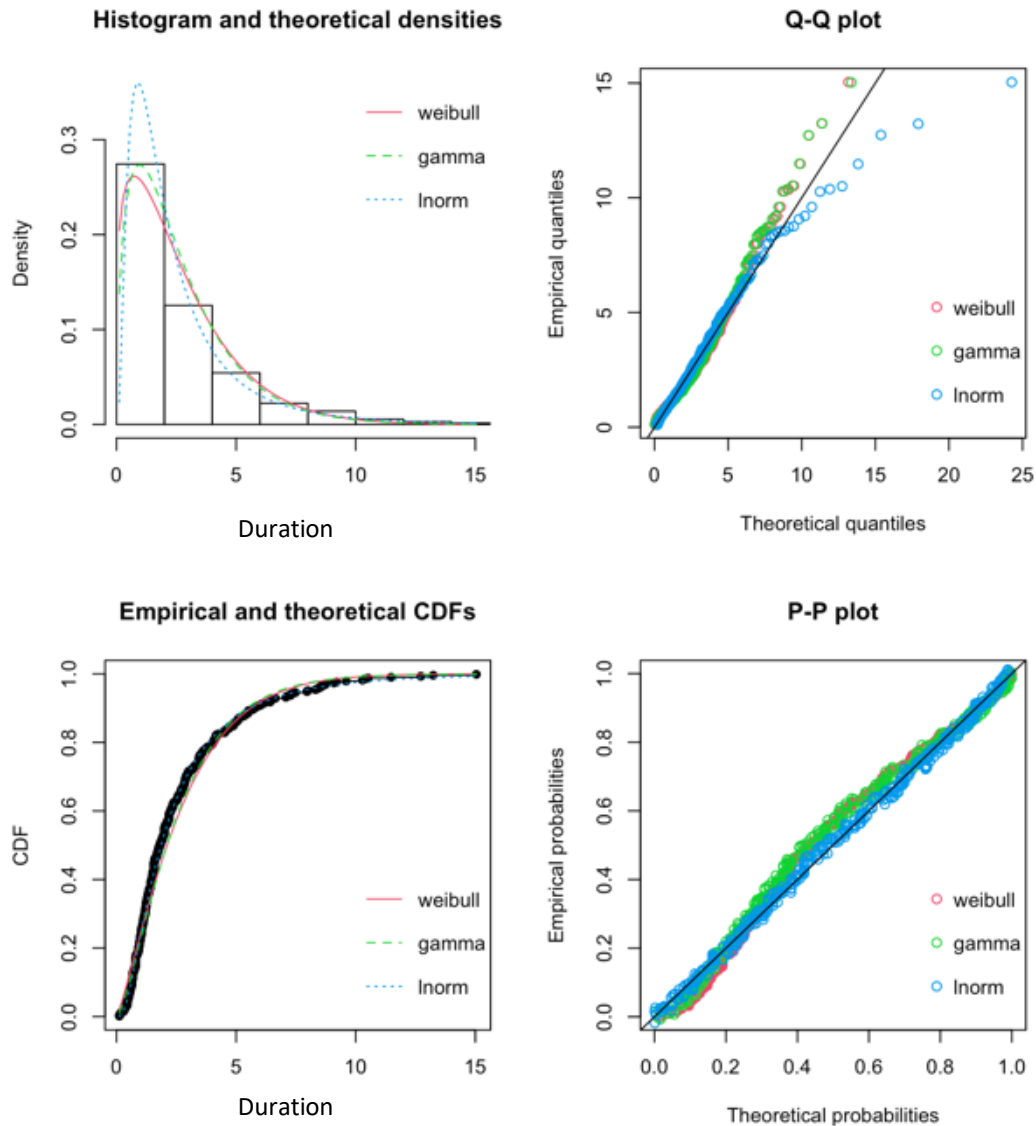

23 **Figure S3. Histogram and theoretical densities, Q-Q and P-P plots depicting the gesture**  
 24 **duration data distribution against the fitted Weibull, Gamma, and Lognormal**  
 25 **distributions.**

26 Histogram represents the distribution of duration data while the red, dashed green, and  
 27 dashed blue lines indicate the theoretical Weibull, Gamma, and Lognormal distributions,  
 28 respectively.

29

**Table S3. Goodness-of-fit statistics compared across fitted distributions to the gesture duration data.**

| Goodness-of-fit statistics | Weibull | Gamma | Lognormal |
|----------------------------|---------|-------|-----------|
|----------------------------|---------|-------|-----------|

---

|                              |            |            |            |
|------------------------------|------------|------------|------------|
| Kolmogorov-Smirnov statistic | 0.07621865 | 0.08155393 | 0.03242513 |
| Cramer-von Mises statistic   | 0.62478933 | 0.55850079 | 0.03735280 |
| Anderson-Darling statistic   | 3.88457421 | 3.08240994 | 0.30076490 |

---

30

**Table S4. Goodness-of-fit information criteria compared across fitted distributions.**

---

| <b>Goodness-of-fit criteria</b> | <b>Weibull</b> | <b>Gamma</b> | <b>Lognormal</b> |
|---------------------------------|----------------|--------------|------------------|
| Akaike's Information Criterion  | 1395.169       | 1381.558     | 1359.478         |
| Bayesian Information Criterion  | 1402.936       | 1389.324     | 1367.244         |

---

31

## 32 Supporting information 3 - Model results

**Table S5. Summary of the Bayesian mixed model analysis results for the Zipf-model which included all the data (N=560).**

| <i>Fixed effects</i>  | <i>b</i>         | <i>SD</i> | <i>95% CrI</i> | <i>Bulk ESS</i> | <i>Tail ESS</i> | $\hat{R}$ |
|-----------------------|------------------|-----------|----------------|-----------------|-----------------|-----------|
| Intercept             | 0.02             | 0.36      | [-0.67; 0.72]  | 1257            | 1528            | 1.00      |
| P                     | 0.90             | 1.26      | [-1.25; 3.81]  | 1298            | 1173            | 1.00      |
| <i>Category</i>       |                  |           |                |                 |                 |           |
| Whole body            | <i>Reference</i> |           |                |                 |                 |           |
| Manual                | -0.24            | 0.39      | [-1.04; 0.49]  | 966             | 1762            | 1.00      |
| <i>Random effects</i> |                  |           |                |                 |                 |           |
| Gesture, N=26         | 0.80             | 0.14      | [0.57; 1.13]   | 809             | 1275            | 1.00      |
| Sequence ID, N=377    | 0.10             | 0.07      | [0.01; 0.25]   | 459             | 960             | 1.00      |
| Signaller ID, N=16    | 0.20             | 0.06      | [0.11; 0.34]   | 1749            | 1936            | 1.00      |

**Table S6. Summary of the Bayesian mixed model analysis results for the Zipf-model which included only Duane's data (N=290).**

|                       |                  |      |               |      |      |      |
|-----------------------|------------------|------|---------------|------|------|------|
| Intercept             | -0.48            | 0.50 | [-1.46; 0.55] | 1867 | 1715 | 1.00 |
| P                     | 1.79             | 1.15 | [-0.39; 4.00] | 1029 | 1547 | 1.00 |
| <i>Category</i>       |                  |      |               |      |      |      |
| Whole body            | <i>Reference</i> |      |               |      |      |      |
| Manual                | 0.31             | 0.50 | [-0.72; 1.30] | 1663 | 1672 | 1.00 |
| <i>Date</i>           |                  |      |               |      |      |      |
| 03/02/2008            | <i>Reference</i> |      |               |      |      |      |
| 05/01/2008            | -0.20            | 0.11 | [-0.43; 0.02] | 3183 | 2572 | 1.00 |
| 20/01/2008            | 0.12             | 0.11 | [-0.09; 0.35] | 2765 | 2161 | 1.00 |
| <i>Random effects</i> |                  |      |               |      |      |      |
| Gesture, N=15         | 0.49             | 0.17 | [0.23; 0.89]  | 867  | 1541 | 1.00 |
| Sequence ID, N=181    | 0.11             | 0.07 | [0.01; 0.26]  | 775  | 1328 | 1.00 |

**Table S7. Summary of the Bayesian mixed model analysis results for the Zipf-model which included data from all individuals but Duane (N=270).**

| <i>Fixed effects</i>  | <i>b</i>         | <i>SD</i> | <i>95% CrI</i> | <i>Bulk ESS</i> | <i>Tail ESS</i> | $\hat{R}$ |
|-----------------------|------------------|-----------|----------------|-----------------|-----------------|-----------|
| Intercept             | 0.27             | 0.46      | [-0.61; 1.21]  | 1442            | 1499            | 1.00      |
| P                     | 0.00             | 0.00      | [-0.00; 0.01]  | 2428            | 1993            | 1.00      |
| <i>Category</i>       |                  |           |                |                 |                 |           |
| Whole body            | <i>Reference</i> |           |                |                 |                 |           |
| Manual                | -0.36            | 0.50      | [-1.38; 63]    | 1565            | 1769            | 1.00      |
| <i>Random effects</i> |                  |           |                |                 |                 |           |
| Gesture, N=18         | 0.87             | 0.19      | [0.58; 1.32]   | 1194            | 1657            | 1.00      |
| Sequence ID, N=196    | 0.20             | 0.10      | [0.01; 0.38]   | 468             | 1053            | 1.01      |

**Table S8. Summary of the Bayesian mixed model analysis results for the Menzerath-model which included all the data (N=530).**

| <i>Fixed effects</i>  | <i>b</i>     | <i>SD</i>   | <i>95% CrI</i>        | <i>Bulk ESS</i> | <i>Tail ESS</i> | $\hat{R}$   |
|-----------------------|--------------|-------------|-----------------------|-----------------|-----------------|-------------|
| Intercept             | 0.69         | 0.14        | [0.41; 0.97]          | 1316            | 1809            | 1.00        |
| Sequence Size         | <b>-0.18</b> | <b>0.04</b> | <b>[-0.26; -0.11]</b> | <b>2374</b>     | <b>1915</b>     | <b>1.00</b> |
| PWB                   | -0.31        | 0.20        | [-0.71; 0.08]         | 2795            | 2529            | 1.00        |
| <i>Random effects</i> |              |             |                       |                 |                 |             |
| Signaller ID, N=16    | 0.36         | 0.11        | [0.18; 0.62]          | 938             | 1501            | 1.00        |
| Sequence ID, N=359    | 0.31         | 0.10        | [0.07; 0.47]          | 356             | 539             | 1.01        |

**Table S9. Summary of the Bayesian mixed model analysis results for the Menzerath-model which included only Duane's data (N=273).**

| <i>Fixed effects</i>  | <i>b</i>         | <i>SD</i>   | <i>95% CrI</i>        | <i>Bulk ESS</i> | <i>Tail ESS</i> | $\hat{R}$   |
|-----------------------|------------------|-------------|-----------------------|-----------------|-----------------|-------------|
| Intercept             | 0.92             | 0.13        | [0.67; 1.17]          | 4365            | 2026            | 1.00        |
| <b>Sequence Size</b>  | <b>-0.23</b>     | <b>0.04</b> | <b>[-0.31; -0.15]</b> | <b>4074</b>     | <b>2145</b>     | <b>1.00</b> |
| PWB                   | -0.69            | 0.58        | [-1.89; 0.38]         | 4900            | 2168            | 1.00        |
| <i>Date</i>           |                  |             |                       |                 |                 |             |
| 03/02/2008            | <i>Reference</i> |             |                       |                 |                 |             |
| 05/01/2008            | 0.06             | 0.14        | [-0.22; 0.34]         | 4821            | 2130            | 1.00        |
| 20/01/2008            | 0.48             | 0.13        | [0.22; 0.75]          | 5325            | 2610            | 1.00        |
| <i>Random effects</i> |                  |             |                       |                 |                 |             |
| Sequence ID, N=181    | 0.11             | 0.08        | [0.00; 0.30]          | 995             | 1009            | 1.00        |

**Table S10. Summary of the Bayesian mixed model analysis results for the Menzerath-model which included data from all individuals but Duane (N=257).**

| <i>Fixed effects</i>  | <i>b</i> | <i>SD</i> | <i>95% CrI</i> | <i>Bulk ESS</i> | <i>Tail ESS</i> | $\hat{R}$ |
|-----------------------|----------|-----------|----------------|-----------------|-----------------|-----------|
| Intercept             | 0.33     | 0.18      | [-0.04; 0.70]  | 2167            | 2241            | 1.00      |
| Sequence Size         | 0.01     | 0.08      | [-0.14; 0.16]  | 2866            | 2438            | 1.00      |
| PWB                   | -0.24    | 0.22      | [-0.69; 18]    | 3474            | 2226            | 1.00      |
| <i>Random effects</i> |          |           |                |                 |                 |           |
| Sequence ID, N=187    | 0.42     | 0.11      | [0.16; 0.62]   | 466             | 423             | 1.01      |
| Signaller ID, N=15    | 0.37     | 0.14      | [0.14; 0.70]   | 842             | 902             | 1.00      |

33 **Abbreviations:** *b*= Estimated mean of the posterior distribution; *SD*= Standard deviation of the posterior  
34 distribution; *CrI*= Two-sided 95% Credible intervals based on quantiles; *Bulk ESS*= the effective sample  
35 size for rank normalized values using split chains; *Tail ESS*= the minimum of the effective sample sizes for  
36 5% and 95% quantiles;  $\hat{R}$ =R hat value, provides information about the convergence of the Bayesian  
37 model algorithm.

## 8 Supporting information 4

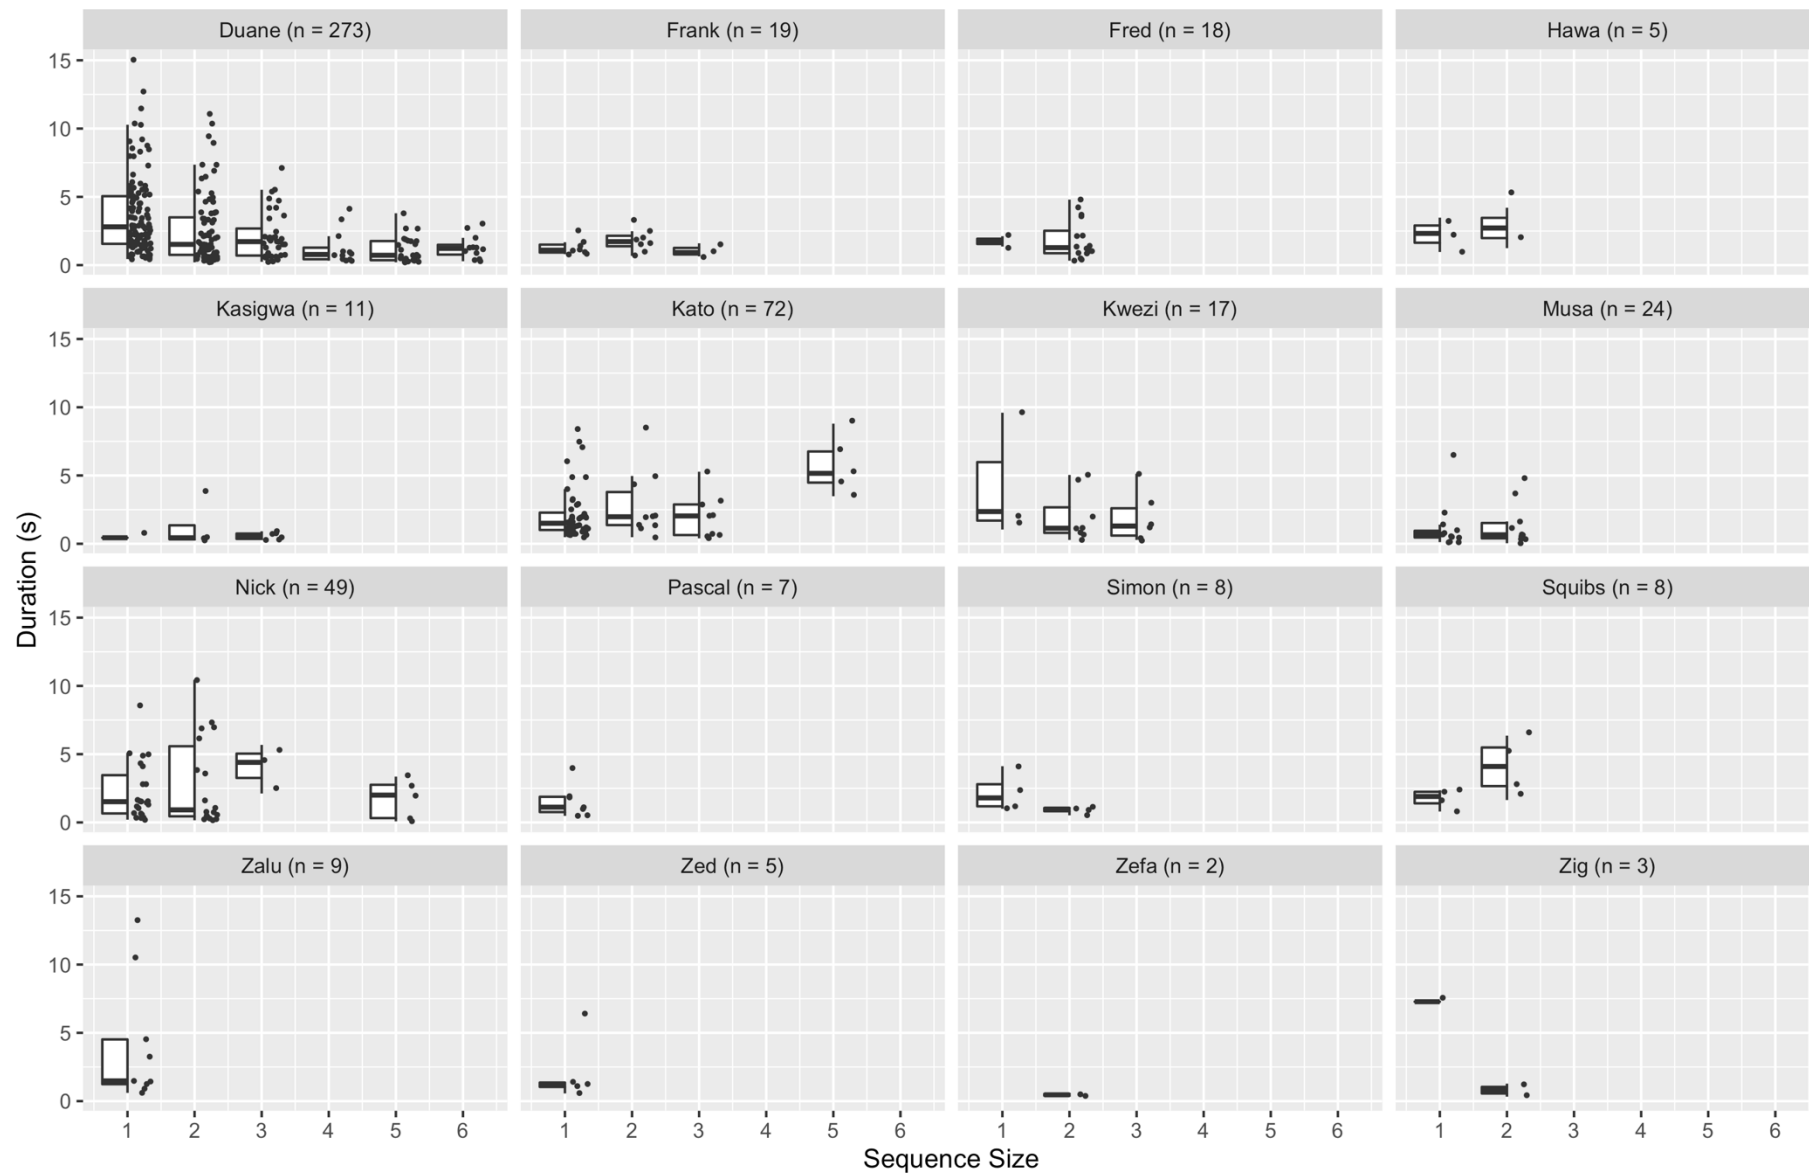

9 **Figure S4. Distribution of gesture durations based on sequence size for each of the 16 individuals in the dataset.** Points represent individual gesture tokens.  
0 Boxplots show median (black central bar), interquartile range (boxes), maximum and minimum values exploding outliers (whiskers). n indicates sample size  
1 for each individual.

## 42 Supporting information 5 – Visual inspection of sequence structure

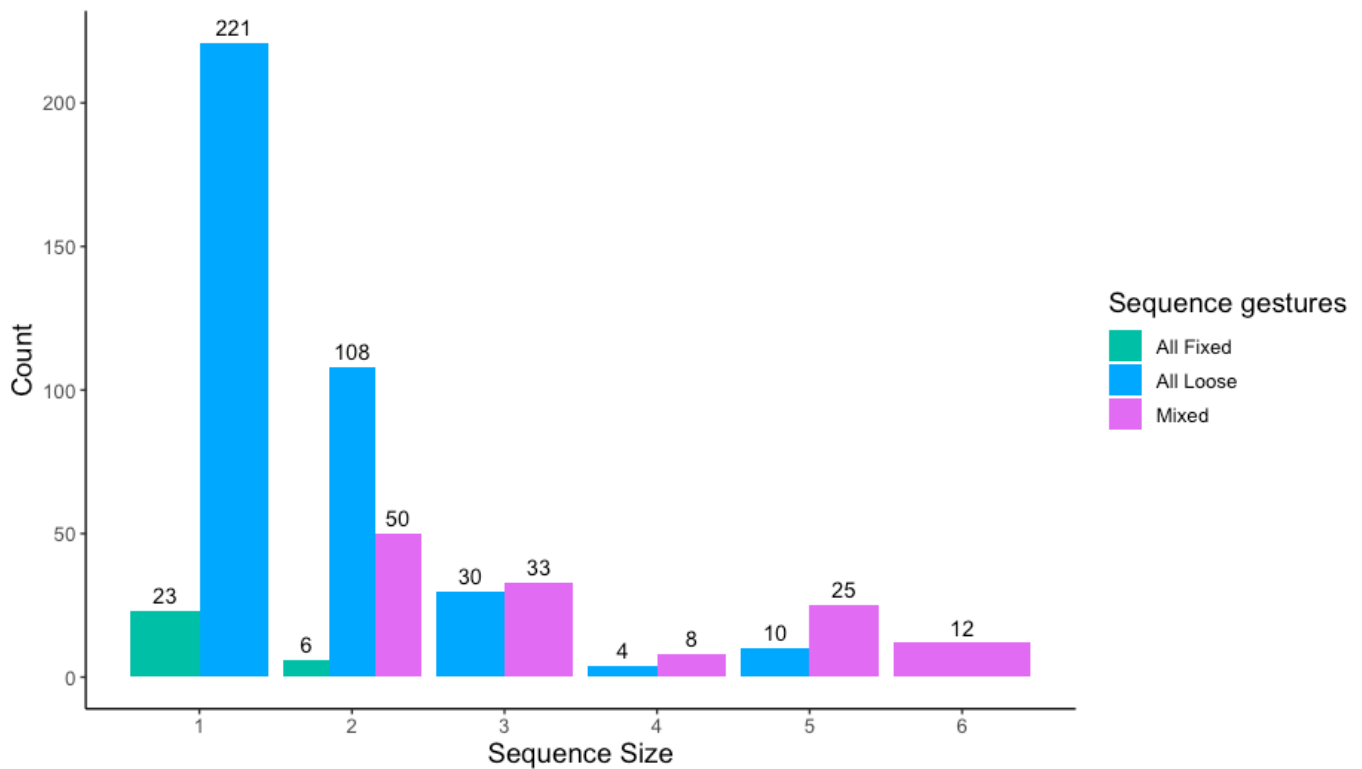

43 **Figure S5. Bar chart showing the frequency distribution of the three different types of**  
44 **sequences depending on their sequence size.**

45 Green sequences comprise only *fixed* duration gestures, blue sequences only *loose* duration  
46 gestures. Pink bars represent sequences formed by a mix of *loose* and *fixed* duration  
47 gestures. Numbers above bars indicate the frequency of each sequence type per sequence  
48 size.

49

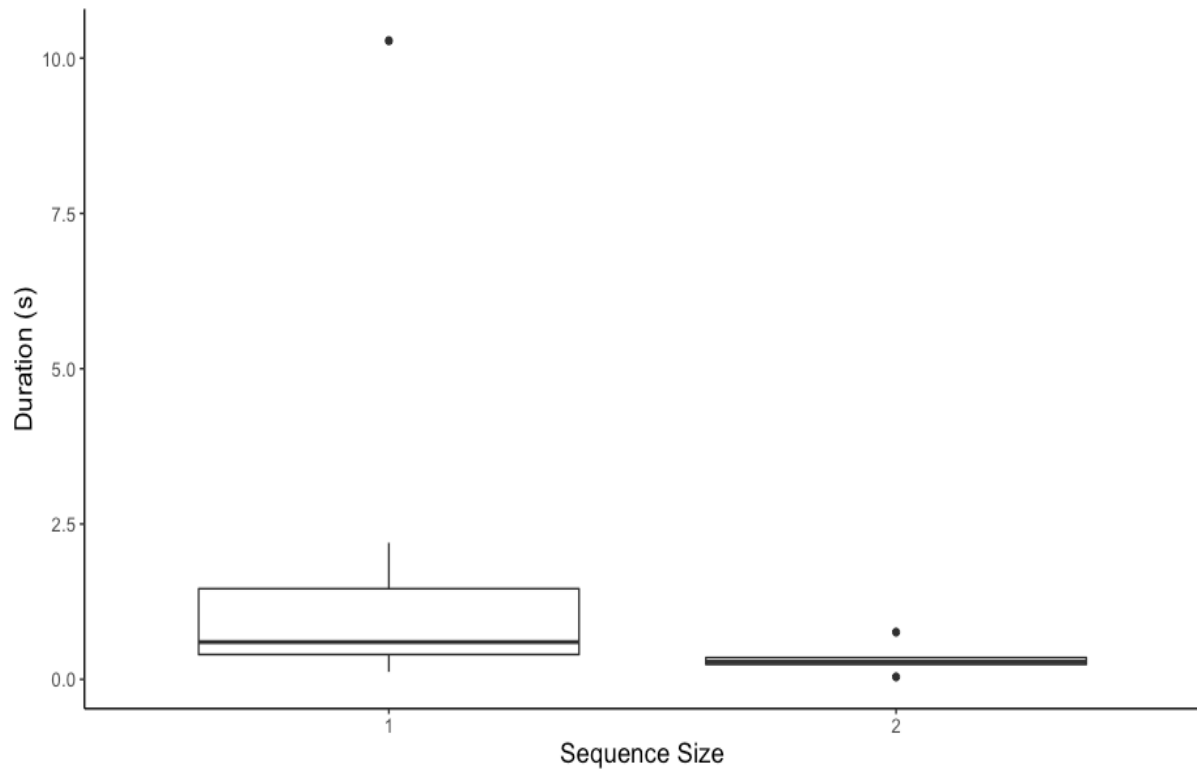

50 **Figure S6. Boxplots of the duration of gestures with constrained duration (i.e., *fixed***

51 **duration gestures) in sequences formed of *fixed* duration gestures solely.**

52 Boxplots show median (black central bar), interquartile range (boxes), maximum and

53 minimum values excluding outliers (whiskers) and outliers (circles).

54



## 55 **Supporting information 6 – Alternative analyses**

### 56 **Correlation and compression**

#### 57 **Methods**

58 Compression predicts that mean duration should be smaller than expected by chance  
59 (Ferrer-i-Cancho et al., 2013). Similarly, optimal compression predicts linguistic laws as a  
60 correlation in a specific direction, *i.e.*, the correlation cannot be positive (Ferrer-i-Cancho et  
61 al., 2013, 2020). Accordingly, we employed one-tailed tests of compression throughout, but  
62 we also report the outcome of two-tailed equivalents for comparison with previous findings  
63 (Heesen et al., 2019).

64 We conducted one-tailed Spearman rank correlation tests to analyse the relationship  
65 between the frequency within the sample of a gesture type (*frequency*) and its mean  
66 duration (*mean gesture type duration*), calculated by dividing the total sum of all durations  
67 of the same gesture type (*Sum*), by *frequency* (*i.e.*,  $duration = Sum / frequency$ ) (Semple et al.,  
68 2013). A similar procedure was used to test for a correlation between the mean gesture  
69 duration within a given sequence (*sequence*) and the number of gesture tokens in the same  
70 sequence (*n*). Mean gesture duration was calculated by dividing the total duration of a  
71 gestural sequence (*Total*) – *i.e.*, the sum of all durations of the gesture tokens in the  
72 sequence excluding pauses between gestures – by the number of gesture tokens within that  
73 sequence *n* (*i.e.*,  $mean\ gesture\ duration\ within\ sequence = sum\ of\ durations\ of\ gestures$   
74  $within\ the\ sequence / number\ of\ gestures\ within\ the\ sequence$ ). A negative correlation  
75 between *mean gesture type duration* and *frequency* coherent with Zipf's law of brevity, and  
76 a negative correlation between *t* and *n* conforming to Menzerath's law could both be  
77 unavoidable artefacts given the relationship between *d* and *f*, and between *t* and *n* – as

78 defining  $d$  involves  $f$ , and defining  $t$  involves  $n$  – which could lead to  $d = 1/f$  and  $t=1/n$   
79 (Ferrer-i-Cancho et al., 2014). Such artefacts can be excluded by establishing that  $D$  and  $f$ ,  
80 and  $T$  and  $n$  are significantly positively correlated (Ferrer-i-Cancho et al., 2014; Semple et al.,  
81 2013), which we tested using two Spearman rank correlation tests. Current findings suggest  
82 that the expressions of linguistic laws are not ‘universal’, and there may be more variation  
83 than previously recognised (Semple et al., 2022). For example: earlier research  
84 demonstrated Zipf’s law of brevity can be present in parts of a repertoire, when it appears  
85 to be absent in the whole repertoire (Ferrer-i-Cancho & Hernández-Fernández, 2013;  
86 Heesen et al., 2019). As a result, we also tested for Zipf’s law of brevity in specific subsets of  
87 the repertoire, namely manual versus whole-body gesture types as these had been found to  
88 differ in previous work (Heesen et al., 2019). Moreover, a specific check of Zipf’s law of  
89 brevity in manual gestures aids in comparison with studies of human communication that  
90 only consider manual signals (for example in signed languages and fingerspelling).

91

## 92 **Compression test**

### 93 **Is the mean duration of chimpanzee sexual solicitation gesture types significantly small?**

94 Following earlier work on chimpanzee play gestures (Heesen et al., 2019), we first calculated  
95 mean duration of all gesture types  $L$  via the equation:

$$96 \quad L = \sum_{i=1}^n p_i e_i \quad (1)$$

97

98 where  $n$  is the number of elements within the repertoire,  $p_i$  is the normalized probability of  
99 the  $i^{th}$  element – calculated by dividing the frequency of the  $i^{th}$  gesture by the total

100 frequency of all gestures – and  $e_i$  is the magnitude of the  $i^{th}$  element (*i.e.*, its average  
101 duration  $d$ ).

102 To test for compression and whether Zipf’s law holds in chimpanzee sexual solicitation  
103 gestural communication, we used a permutation test assessing whether  $L$  was significantly  
104 small (Sokal & Rohlf, 1995). Following (Heesen et al., 2019) we created “*a control*  
105 *distribution of  $L$  ( $L'$ ) defined by a permutation function  $\pi(i)$ ” and calculated the left  $p$ -value  
106 by dividing the number of permutations where  $L' \leq L$  by the number of total permutations,  
107 here  $10^5$ .  $L$  was also calculated and tested for each subset created.*

$$108 \quad L' = \sum_{i=1}^n p_i e_{\pi(i)} \quad (2)$$

109 *Is the expected total sum of the duration of gestures of each sequence significantly small?*

110 As explained by (Heesen et al., 2019), the total duration of a collection of sequences  
111 can be quantified as

$$112 \quad M = \sum_{i=1}^N T_i \quad (3)$$

113 where  $T_i$  is the total duration of the  $i$ th sequence and  $N$  is the number of sequences.

114 In turn,

$$115 \quad T = \sum_{j=1}^{n_i} t_{ij} \quad (4)$$

116 where  $t_{ij}$  is the duration of the  $j$ th element of the  $i$ th sequence and  $n_i$  is the size of the  $i$ th  
117 sequence. Given that the mean duration of gestures from the  $i$ th sequence can be

118 expressed as  $(t_{ij})_i = \frac{T_i}{n_i}$ ,  $M$  can be defined as

119 
$$M = \sum_{i=1}^N n_i (t_{ij})_i \quad (5)$$

120  $M$  was calculated through this equation and was tested to assess whether it is significantly  
121 small. We performed a similar permutation test to that conducted to test for the  
122 significance of  $L$ , to check whether  $M$  was significantly small as compared to the values  
123 generated by random permutation of the data (Zipf, 1936). In such case,  $n_i$  has the role of  $p_i$   
124 and  $(t_{ij})_i$  has the role of  $e_i$  in the test, with  $n_i$  and  $(t_{ij})_i$  remaining constant during the test.

125 The permutation test produces a left  $p$ -value to check if  $L$  (or  $M$ ) is significantly small  
126 and a right  $p$ -value to check if  $L$  (or  $M$ ) is significantly large compared to the distribution of  
127 the values created by a permutation of the data (Heesen et al., 2019). The total number of  
128 permutations carried out was  $R=10^5$ .

129

## 130 **Results of one-tailed analyses**

### 131 **Zipf's law of brevity**

#### 132 **Do chimpanzee sexual solicitation gestures follow Zipf's law of brevity?**

133 We did not find a pattern in agreement with Zipf's law of brevity; there was no evidence for  
134 a significant negative correlation between mean gesture type duration ( $d$ ) and frequency of  
135 use ( $f$ ) (Spearman correlation:  $r_s=0.30$ ,  $n=26$ ,  $p=0.066$ ), in agreement with the Bayesian  
136 model analysis. Consistent with this result, the compression test revealed that the expected  
137 mean code length of gesture types  $L$  had a magnitude of 2.39s and was not significantly  
138 small ( $p_{left}=0.951$ ). Rather,  $L$  was significantly big ( $p_{right}=0.05$ , Figure S7).

139

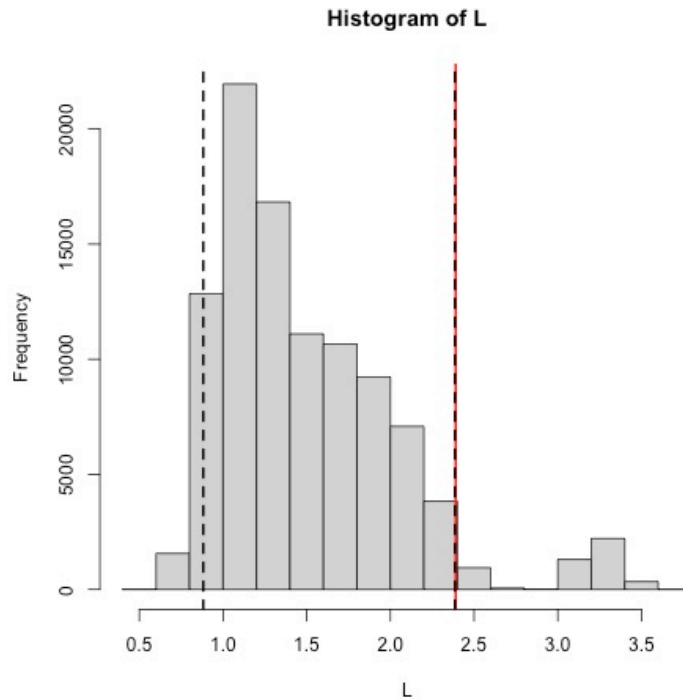

140 **Figure S7. Histogram showing the distribution of the permuted  $L$  values. Observed  $L$  value**  
141 **is highlighted with the red continuous line. Black dashed line indicates the lower and**  
142 **upper 5% of the permuted data.**

143

144 **Subset analysis: whole-body and manual gesture types.**

145 We found no evidence for a negative correlation between  $d$  and  $f$  when separating whole-  
146 body gestures from manual gestures (Spearman's rank correlation: whole-body,  $r_s = -0.3$ ,  $n = 5$ ,  
147  $p = 0.342$ ; manual,  $r_s = 0.42$ ,  $n = 21$ ,  $p_{left} = 0.969$ ). Rather, manual gestures showed a significant  
148 positive correlation ( $r_s = 0.42$ ,  $n = 21$ ,  $p_{right} = 0.031$ ). Compression tests revealed that for whole-  
149 body gestures,  $L = 0.13$ s and was neither significantly big or small ( $p_{left} = 0.174$ ,  $p_{right} = 0.817$ ),  
150 and for manual gestures,  $L = 2.26$ s and, if anything, tended towards being significantly big  
151 ( $p_{right} = 0.058$ ) rather than small ( $p_{left} = 0.942$ ; Figure S8).

152

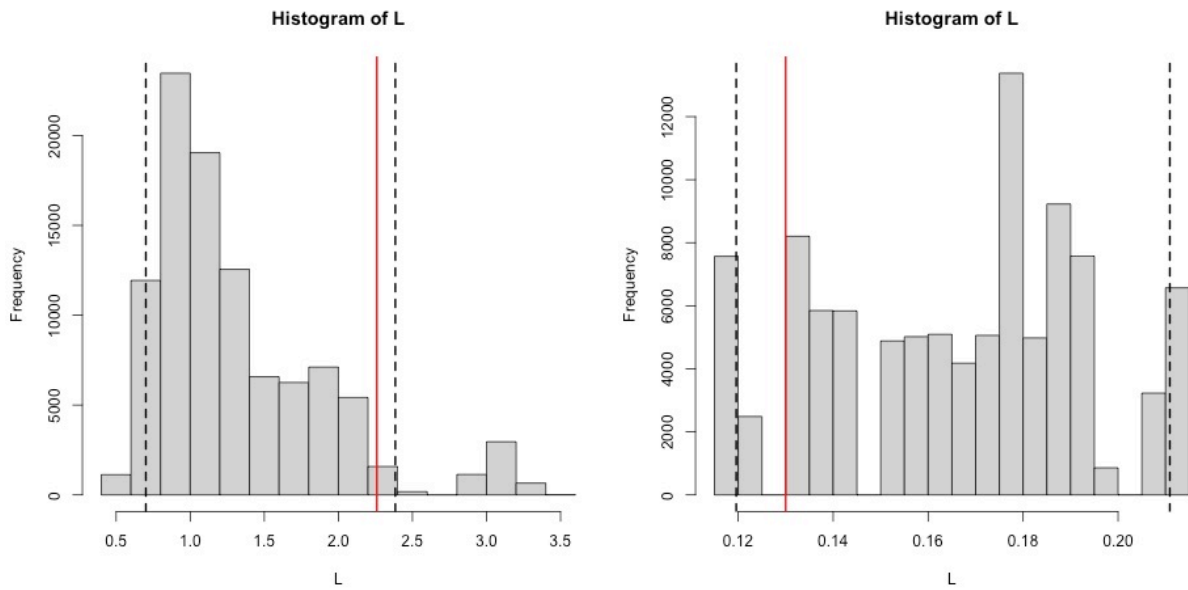

153 **Figure S8. Histograms showing the distribution of the permuted  $L$  values for manual**  
154 **gestures (left) and whole-body gestures (right). Observed  $L$  value is highlighted with the**  
155 **red continuous line. Black dashed lines indicate the upper and lower 5% of the permuted**  
156 **data.**

157

### 158 **Do chimpanzee sexual solicitation gesture sequences follow Menzerath's law?**

159 We tested Menzerath's law in 359 sequences, composed of 530 gesture tokens; there was  
160 no evidence for a negative relationship between mean constituent duration and sequence  
161 size (Spearman's rank correlation:  $r_s = -0.08$   $n=359$ ,  $p=0.076$ ). However, the compression test  
162 revealed that the total sum of the duration of each sequence  $M$  had a value of 1300.67 and  
163 was significantly small ( $n=359$ ,  $p=0.003$ ; Figure S9).

164

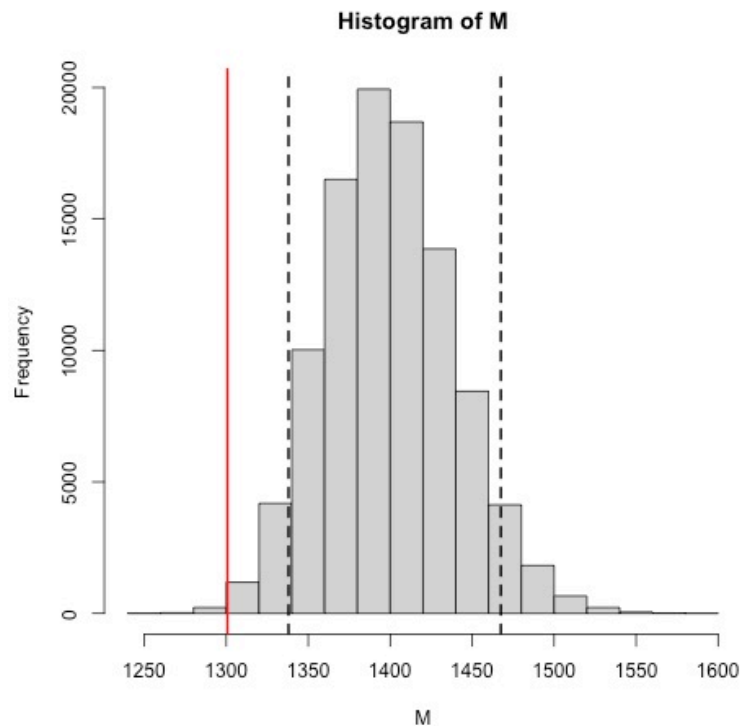

165 **Figure S9. Histogram showing the distribution of the permuted  $M$  values. Observed  $M$**   
166 **value is highlighted with the red continuous line. Black dashed line indicates lower 5% of**  
167 **the permuted data.**

168

## 169 **Discussion**

170 The results from the correlation analysis must be taken with caution as this analysis does  
171 not control for individual variation, gesture type, and sequence in which the gesture is  
172 performed. The Bayesian model that included these factors and which tested for Zipf's law  
173 of brevity (Zipf-model) was similar to the respective null-model, suggesting that frequency  
174 of gesture type within the dataset and category of gesture type did not predict gesture  
175 duration.

176

177 The contrast between the correlation analysis and the compression analysis for Menzerath's  
178 law highlight how individual variation may show an apparent absence of pattern in the  
179 correlation analysis but a strong effect in the Bayesian model analysis, where it is controlled  
180 for.

## 181 **Results of two-tailed analyses**

### 182 **Zipf's law of brevity**

183 We did not find a pattern corresponding to Zipf's law of brevity, with no correlation  
184 between mean gesture type duration ( $d$ ) and frequency of use ( $f$ ) (Spearman correlation:  
185  $r_s=0.30$ ,  $n=26$ ,  $p=0.131$ ). When analysing only manual gestures,  $f$  and  $d$  tended to be  
186 significantly positively correlated (Spearman correlation:  $r_s=0.42$ ,  $n=21$ ,  $p=0.061$ ).  
187 Conversely, we did not find any correlation between  $f$  and  $d$  in whole body gestures  
188 (Spearman correlation:  $r_s=-0.3$ ,  $n=5$ ,  $p=0.683$ ).

### 189 **Menzerath's law**

190 We failed to find a pattern between sequence size  $n$  and mean constituent duration  $t$  of the  
191 same sequence that followed Menzerath's law (Spearman correlation:  $r_s=-0.08$ ,  $n=376$ ,  
192  $p=0.142$ ). When analysing sequences comprising only whole-body size and average gesture  
193 duration showed a significant positive correlation (Spearman correlation:  $r_s=0.59$ ,  $n=20$   
194  $p=0.005$ ). Sequence size and average gesture duration did not correlate in sequences  
195 composed of only manual gestures (Spearman correlation:  $r_s=-0.06$ ,  $n=315$   $p=0.324$ ), or in  
196 those formed by both manual and body gestures (Spearman correlation:  $r_s=0.09$ ,  $n=24$   
197  $p=0.673$ ).

### 198 **Bayesian analysis on the medians of the 26 gesture types**



199 We ran additional brms analysis computing the median duration per each gesture type  
 200 across the whole dataset. Median duration of each gesture type was assigned as response  
 201 variable, category of gesture as fixed factor as well as frequency of that gesture type as a  
 202 predictor. We ran a model with 2000 iterations and 3 chains. The full model was no different  
 203 from the null model which excluded the frequency of gesture type as a predictor (LOO  
 204 difference:  $-0.3 \pm 0.5$ ; Table S11). We ran a similar analysis on the gestures performed by the  
 205 one individual Duane, with similar results (full-null model comparison, LOO difference:  $-0.6 \pm$   
 206  $1.2$ ; Table S12). Please note that that individual identity is not controlled for in these  
 207 analyses and they should be interpreted with caution.  
 208

**Table S11. Summary of the Bayesian mixed model analysis results for the Zipf-model which included only a median value per gesture type as response variable, the frequency of gesture type as predictor and category of gesture type as control (N=26).**

| <i>Fixed effects</i> | <i>b</i>         | <i>SD</i> | <i>95% CrI</i> | <i>Bulk ESS</i> | <i>Tail ESS</i> | $\hat{R}$ |
|----------------------|------------------|-----------|----------------|-----------------|-----------------|-----------|
| Intercept            | 0.10             | 0.33      | [-0.55; 0.77]  | 2267            | 1782            | 1.00      |
| F                    | 0.00             | 0.00      | [-0.00; 0.01]  | 2861            | 1404            | 1.00      |
| <i>Category</i>      |                  |           |                |                 |                 |           |
| Whole body           | <i>Reference</i> |           |                |                 |                 |           |
| Manual               | -0.24            | 0.36      | [-0.96; 0.48]  | 1995            | 1776            | 1.00      |

209

**Table S12. Summary of the Bayesian mixed model analysis results for the Zipf-model which included only a median value per gesture type as response variable, the frequency of gesture type as predictor and category of gesture type as control, considering only the gestures performed by Duane (N=15).**

| <i>Fixed effects</i> | <i>b</i>         | <i>SD</i> | <i>95% CrI</i> | <i>Bulk ESS</i> | <i>Tail ESS</i> | $\hat{R}$ |
|----------------------|------------------|-----------|----------------|-----------------|-----------------|-----------|
| Intercept            | -0.55            | 0.57      | [-1.71; 0.60]  | 2254            | 1851            | 1.00      |
| F                    | 0.01             | 0.00      | [-0.00; 0.02]  | 2566            | 1771            | 1.00      |
| <i>Category</i>      |                  |           |                |                 |                 |           |
| Whole body           | <i>Reference</i> |           |                |                 |                 |           |
| Manual               | 0.26             | 0.57      | [-0.89; 1.48]  | 2334            | 1714            | 1.00      |

210
