# Supplementary material for: Variable expression of linguistic laws in ape gesture: a case study from chimpanzee sexual solicitation
Source: bioRxiv or medRxiv preprint supplement (doi:10.1101/2021.05.19.444810), 2022-10-10
Supplement: Supplementary file [file media-1.pdf]

## 1 **Supporting information 1**

### 2 **Is the mean duration of chimpanzee sexual solicitation gesture types significantly small?**

3 Following earlier work on chimpanzee play gestures (Heesen et al., 2019), we first calculated  
4 mean duration of all gesture types  $L$  via the equation:

$$5 \quad L = \sum_{i=1}^n p_i e_i \quad (1)$$

6

7 where  $n$  is the number of elements within the repertoire,  $p_i$  is the normalized probability of  
8 the  $i^{th}$  element – calculated by dividing the frequency of the  $i^{th}$  gesture by the total  
9 frequency of all gestures – and  $e_i$  is the magnitude of the  $i^{th}$  element (*i.e.*, its average  
10 duration  $d$ ).

11 To test for compression and whether Zipf's law holds in chimpanzee sexual solicitation  
12 gestural communication, we used a permutation test assessing whether  $L$  was significantly  
13 small (Sokal & Rohlf, 1995). Following (Heesen et al., 2019) we created “*a control*  
14 *distribution of  $L$  ( $L'$ ) defined by a permutation function  $\pi(i)$ ” and calculated the left  $p$ -value  
15 by dividing the number of permutations where  $L' \leq L$  by the number of total permutations,  
16 here  $10^5$ .  $L$  was also calculated and tested for each subset created.*

$$17 \quad L' = \sum_{i=1}^n p_i e_{\pi(i)} \quad (2)$$

18 *Is the expected total sum of the duration of gestures of each sequence significantly small?*

19 As explained by (Heesen et al., 2019), the total duration of a collection of sequences  
20 can be quantified as

21 
$$M = \sum_{i=1}^N T_i \quad (3)$$

22 where  $T_i$  is the total duration of the  $i$ th sequence and  $N$  is the number of sequences.

23 In turn,

24 
$$T = \sum_{j=1}^{n_i} t_{ij} \quad (4)$$

25 where  $t_{ij}$  is the duration of the  $j$ th element of the  $i$ th sequence and  $n_i$  is the size of the  $i$ th  
26 sequence. Given that the mean duration of gestures from the  $i$ th sequence can be

27 expressed as  $(t_{ij})_i = \frac{T_i}{n_i}$ ,  $M$  can be defined as

28 
$$M = \sum_{i=1}^N n_i (t_{ij})_i \quad (5)$$

29  $M$  was calculated through this equation and was tested to assess whether it is significantly

30 small. We performed a similar permutation test to that conducted to test for the

31 significance of  $L$ , to check whether  $M$  was significantly small (Zipf, 1936). In such case,  $n_i$  has

32 the role of  $p_i$  and  $(t_{ij})_i$  has the role of  $e_i$  in the test, with  $n_i$  and  $(t_{ij})_i$  remaining constant

33 during the test.

34

## 35 Supporting information 2

### 36 Duration distribution analysis

37 Before performing the GLMM analysis we analysed the distribution of the gesture  
38 duration data by (1) visually inspecting its empirical density and cumulative distribution (Fig  
39 1 in S2 File) and (2) assessing its skewness and kurtosis via the visual inspection of the Cullen  
40 and Frey graph (Fig 2 in S2 File). Fig 1 shows how the data is skewed towards low values, as  
41 almost half of the data lays between 0 and 3 seconds. Further, we fitted three theoretical  
42 distributions to the data - namely Weibull, Gamma and Lognormal – and compared  
43 loglikelihood values (Table 1 in S2 File). We then plotted the three distributions and visually  
44 inspected the Q-Q, P-P and histogram density plots (Fig 3 in S2 File). Finally, we compared  
45 Weibull, Gamma and Lognormal distributions against gesture duration data distribution via  
46 goodness-of-fit tests and goodness-of-fit information criterion (Table 2 and 3 in S2 File),  
47 which helped identify the lognormal distribution as the best fitting one. Therefore, we  
48 proceeded with log-transforming the duration variable to best fit model assumptions.

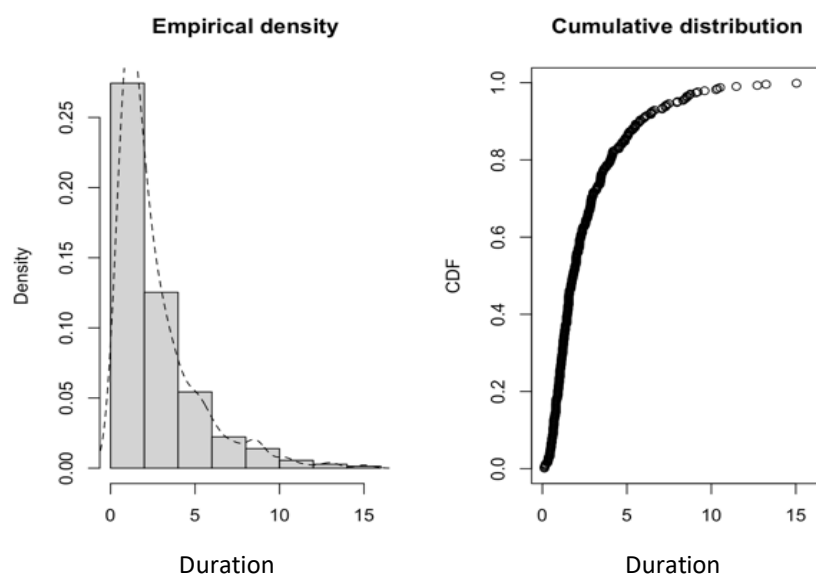

49 **Fig 1. Empirical distribution of gesture duration.**

50 Histogram and empirical cumulative distribution function (CDF) plots representing the  
 51 distribution of gesture duration. Histogram bars represent sample distribution, dashed line  
 52 indicates empirical density.

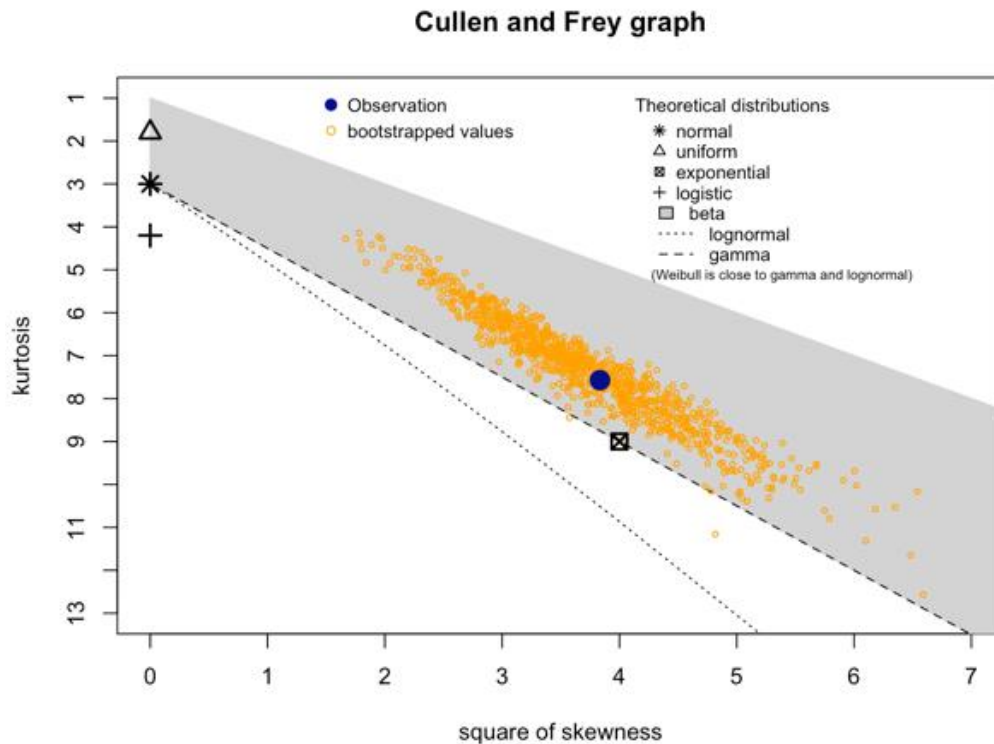

53 **Fig 2. Cullen and Frey graph for gesture duration.**

54 The graph depicts the distribution of the skewness and kurtosis of gesture duration data  
 55 with bootstrapped values, plotted against other theoretical distributions, namely normal,  
 56 uniform, exponential, logistic, beta, lognormal and gamma.

57

58 **Table 1. Estimate and standard error for fitting the parameters of three theoretical**  
 59 **distributions to the distribution of the gesture duration data.**

| Distribution | Parameters | Estimate  | Std Error  | Loglikelihood |
|--------------|------------|-----------|------------|---------------|
| Weibull      | Shape      | 1.229711  | 0.04786805 | -695.5846     |
|              | Scale      | 2.848181  | 0.12958597 |               |
| Gamma        | Shape      | 1.5695397 | 0.10700744 | -688.7789     |
|              | Rate       | 0.5933806 | 0.04755517 |               |

|           |         |           |            |           |
|-----------|---------|-----------|------------|-----------|
| Lognormal | meanlog | 0.6214851 | 0.04530977 | -677.7389 |
|           | sdlog   | 0.8584975 | 0.03203865 |           |

60

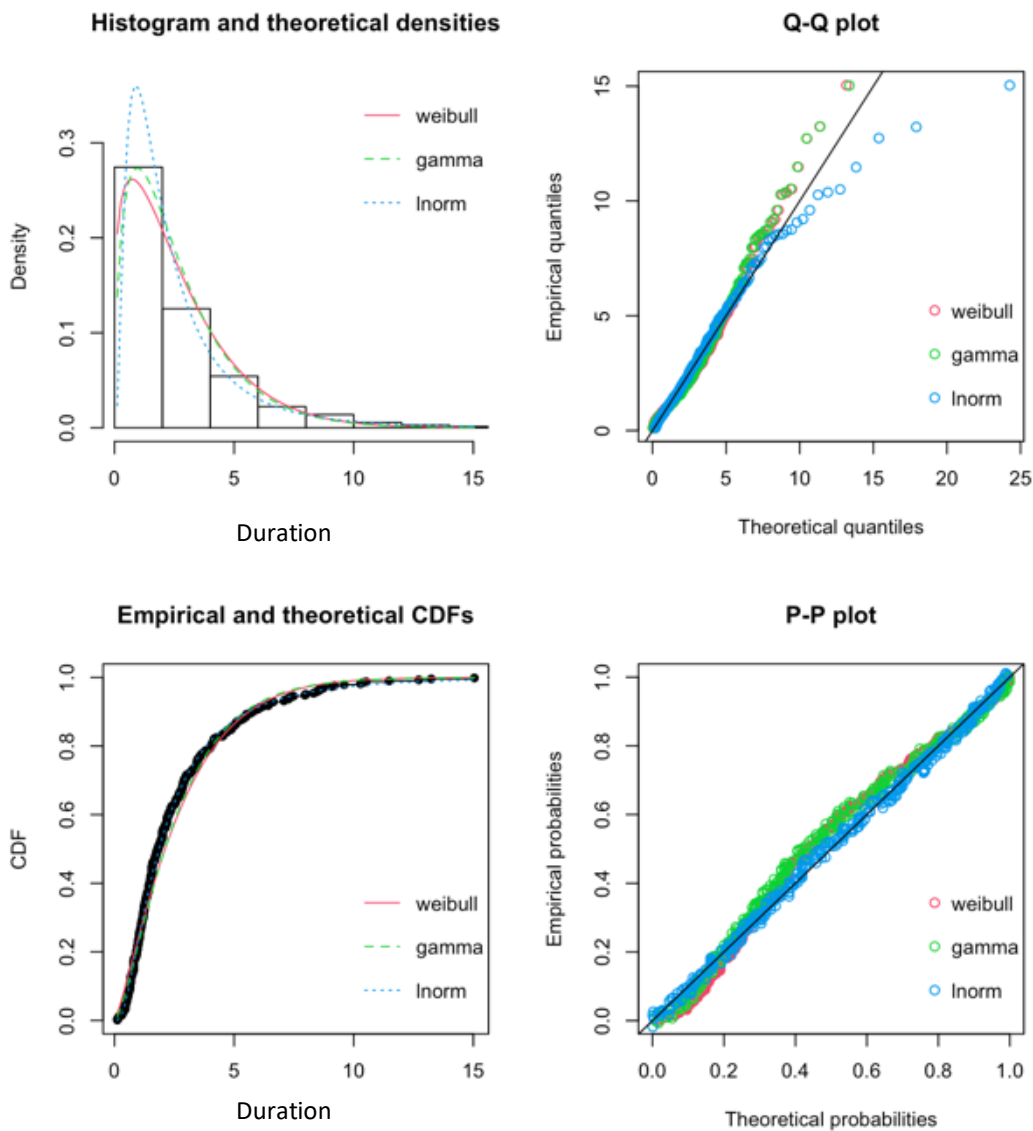

61 **Fig 3. Histogram and theoretical densities, Q-Q and P-P plots depicting the gesture**  
62 **duration data distribution against the fitted Weibull, Gamma and Lognormal distributions.**

63 Histogram represents the distribution of duration data while the red, dashed green and  
64 dashed blue lines indicate the theoretical Weibull, gamma and lognormal distributions,  
65 respectively.

66

67 **Table 2. Goodness-of-fit statistics compared across fitted distributions to the gesture**  
68 **duration data.**

---

| <b>Goodness-of-fit statistics</b> | <b>Weibull</b> | <b>Gamma</b> | <b>Lognormal</b> |
|-----------------------------------|----------------|--------------|------------------|
| Kolmogorov-Smirnov statistic      | 0.07621865     | 0.08155393   | 0.03242513       |
| Cramer-von Mises statistic        | 0.62478933     | 0.55850079   | 0.03735280       |
| Anderson-Darling statistic        | 3.88457421     | 3.08240994   | 0.30076490       |

---

69

70 **Table 3. Goodness-of-fit information criteria compared across fitted distributions.**

---

| <b>Goodness-of-fit criteria</b> | <b>Weibull</b> | <b>Gamma</b> | <b>Lognormal</b> |
|---------------------------------|----------------|--------------|------------------|
| Akaike's Information Criterion  | 1395.169       | 1381.558     | 1359.478         |
| Bayesian Information Criterion  | 1402.936       | 1389.324     | 1367.244         |

---

71

72

### 73 **Supporting information 3**

#### 74 **Two-tailed results**

##### 75 **Zipf's law of brevity**

76 We did not find a pattern corresponding to Zipf's law of brevity, with no correlation  
77 between mean gesture type duration ( $d$ ) and frequency of use ( $f$ ) (Spearman correlation:  
78  $r_s=0.30$ ,  $n=26$ ,  $p=0.131$ ), which remained non-significant when excluding an outlier gesture  
79 type performed more than 250 times (Spearman correlation:  $r_s=0.22$ ,  $n=25$ ,  $p=0.293$ ). When  
80 analysing only manual gestures,  $f$  and  $d$  tended to be significantly positively correlated  
81 (Spearman correlation:  $r_s=0.42$ ,  $n=21$ ,  $p=0.061$ ). Conversely, we did not find any correlation  
82 between  $f$  and  $d$  in whole body gestures (Spearman correlation:  $r_s=-0.3$ ,  $n=5$ ,  $p=0.683$ ).

##### 83 **Menzerath's law**

84 We failed to find a pattern between sequence size  $n$  and mean constituent duration  $t$  of the  
85 same sequence that followed Menzerath's law (Spearman correlation:  $r_s=-0.08$ ,  $n=376$ ,  
86  $p=0.142$ ). When analysing sequences comprising only whole-body size and average gesture  
87 duration showed a significant positive correlation (Spearman correlation:  $r_s=0.59$ ,  $n=20$   
88  $p=0.005$ ). Sequence size and average gesture duration did not correlate in sequences  
89 composed of only manual gestures (Spearman correlation:  $r_s=-0.06$ ,  $n=315$   $p=0.324$ ), or in  
90 those formed by both manual and body gestures (Spearman correlation:  $r_s=0.09$ ,  $n=24$   
91  $p=0.673$ ).

## Supporting information 4

Ethogram of the 26 gesture types recorded in the dataset. Definitions are taken from (Hobaiter & Byrne, 2011a) and (Nishida, 2010).

| <b>Gesture</b>                | <b>Description</b>                                                                                                                                    | <b>Type</b> |
|-------------------------------|-------------------------------------------------------------------------------------------------------------------------------------------------------|-------------|
| Beckon                        | Hand is moved in an upwards sweep from the elbow or wrist towards signaller.                                                                          | Manual      |
| Big loud scratch              | Loud exaggerated scratching movement on the signaller's own body.                                                                                     | Manual      |
| Drum                          | Short hard audible contact of alternate palms against an object, usually tree roots.                                                                  | Manual      |
| Hit object/ground             | Movement of whole arm, with short hard audible contact of closed fist to an object or the ground. Includes gestures performed with one and both arms. | Manual      |
| Hit object/ground with object | As 'hit object/ground' but the signaller holds an object in the hand/hands, which contacts the ground.                                                | Manual      |
| Jump                          | While bipedal, both feet leave the ground simultaneously, accompanied by horizontal displacement through the air.                                     | Body        |
| Leaf clipping                 | Strips are torn from a leaf (or leaves) held in the hand using the teeth; produces a conspicuous sound.                                               | Manual      |
| Locomote: bipedal             | The signaller walks bipedally while standing up.                                                                                                      | Body        |
| Object move                   | Object is displaced in one direction, contact is maintained throughout movement. Includes gestures performed with one or both hands.                  | Manual      |
| Object shake                  | Repeated back and forth movement of an object, usually stem of shrub, branch of tree or woody vine, performed with either one or both hands.          | Manual      |
| Present: genitals forwards    | Signaller shows genitals to recipient.                                                                                                                | Body        |
| Raise arm                     | Raise arm and/or hand vertically in the air and direct palm to companion.                                                                             | Manual      |



|                            |                                                                                                                                                                                                |        |
|----------------------------|------------------------------------------------------------------------------------------------------------------------------------------------------------------------------------------------|--------|
| Reach: palm                | Arm extended to the recipient with the palm exposed. Typically held up or to the side, although very occasionally down. It is the palm or tip of the fingers that is closest to the recipient. | Manual |
| Reach: wrist               | Arm extended to the recipient with the palm sheltered (fingers are curled), and it is either the wrist, or the back of the fingers that is reached out to the recipient.                       | Manual |
| Rocking: sitting           | Slight or vigorous side to side movements of the body when the signaller is sitting.                                                                                                           | Body   |
| Shake arm                  | Small repeated shake (adduct or abduct) of horizontally-held arm at another. Includes gestures performed with either one or both arms.                                                         | Manual |
| Shake head                 | Small repeated back and forth motion of the head.                                                                                                                                              | Body   |
| Stomp 2-feet object/ground | As 'stomp object/ground' but performed with both feet.                                                                                                                                         | Manual |
| Stomp object/ground        | Sole of the foot is lifted vertically and brought into a short hard audible contact with the surface being stood upon (e.g., ground, branch).                                                  | Manual |
| Stomping object/ground     | As 'stomp object/ground' but performed repeatedly.                                                                                                                                             | Manual |
| Swing                      | Large back and forth movement of the arm held below the shoulder, or of leg from the hip. Includes gestures performed with one and two arms.                                                   | Manual |
| Swing: directed            | As 'swing' but the direction of the swing indicates the direction of desired movement, immediately followed by the recipient moving as indicated.                                              | Manual |
| Swing: with object         | As 'swing' but the signaller holds an object in their hand/hands (e.g., branch, leaves, etc).                                                                                                  | Manual |
| Throw object               | Object is moved and released so that there is displacement through the air after the moment of release.                                                                                        | Manual |
| Thrust                     | Rhythmic back and forth movements of the pelvis.                                                                                                                                               | Body   |
| Wave                       | Large repeated back and forth movement of the arm raised above the shoulder.                                                                                                                   | Manual |

94 **Supporting information 5**

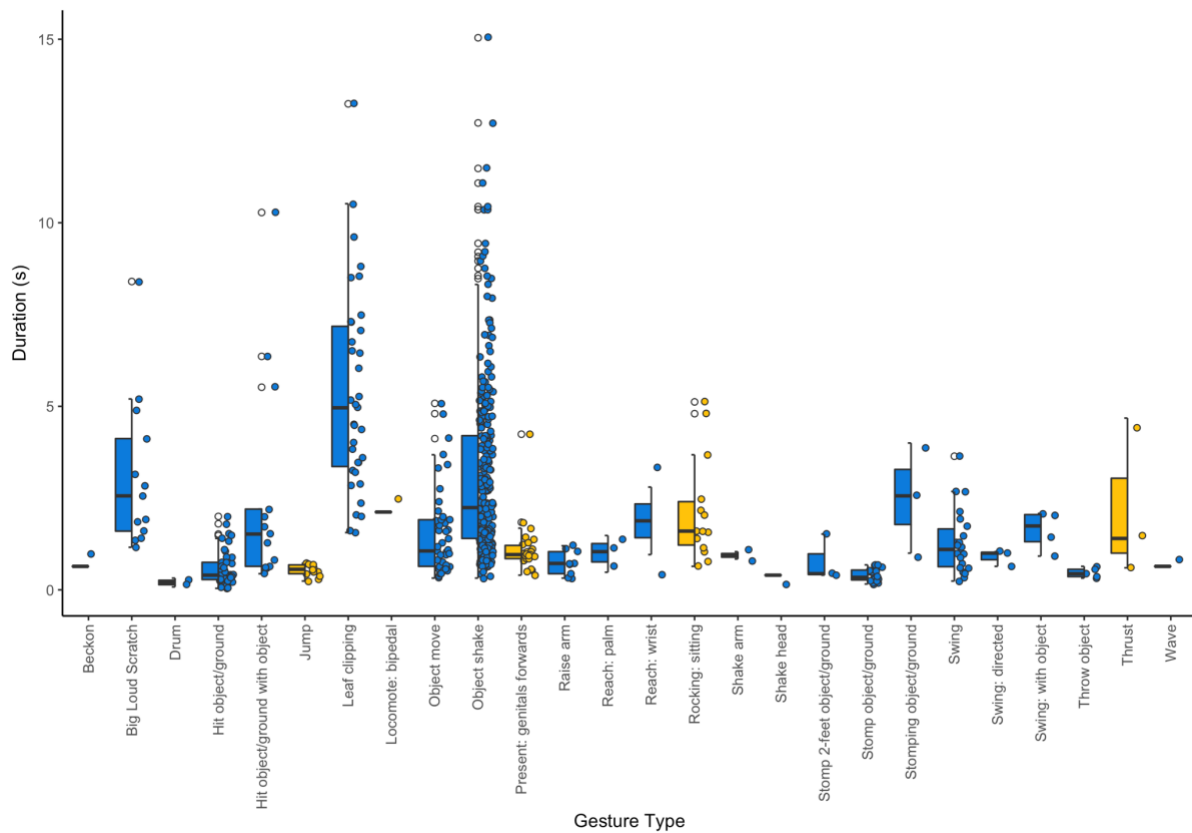

95 **S5 Fig. Distribution of gestural instances across the 26 gesture types detected with relative**  
 96 **gesture duration.** Boxplots represent the median (black bar), the interquartile range – IQR  
 97 (boxes), maximum and minimum values excluding outliers (whiskers) and outliers (black  
 98 dots). Points represent individual gestures. Whole-body gestures are indicated in yellow,  
 99 manual gestures in blue.

101 **Supporting information 6**

102 **Model 2 results**

103 Results for the Model 2 GLMM analysis having response variable a subset of the gesture  
 104 duration data which excluded all durations from the outlier gesture Object shake performed  
 105 more than 250 times. No factor analysed had a significant impact on gesture duration

106 **Table 1. GLMM results for Model 2.**

| Predictors              | Estimate ± SE | Parameter | Confidence intervals <sup>107</sup> |                      |
|-------------------------|---------------|-----------|-------------------------------------|----------------------|
|                         |               |           | Lower                               | Upper <sup>108</sup> |
| (Intercept)             | 0.39 ± 0.37   | 1.06      | -0.33                               | 1.12                 |
| Proportion <sup>a</sup> | -5.85 ± 5.12  | -1.14     | -15.82                              | 4.23 <sup>109</sup>  |
| Category <sup>b</sup>   | -0.19 ± 0.37  | -0.53     | -0.91                               | 0.53 <sup>110</sup>  |
| Proportion *Category    | 5.96 ± 5.28   | 1.129     | -4.48                               | 16.23 <sup>111</sup> |
| <b>Random effect</b>    |               |           |                                     |                      |
| $\sigma^2$              | 0.88          |           |                                     | 112                  |
| $\tau_{00}$ Signaller   | 0.20          |           |                                     | 113                  |
| Number of individuals   | 16            |           |                                     | 114                  |

115 In Model 2 we tested for Zipf’s law of brevity by fitting a Generalized Linear Mixed Model using  
 116 ‘lme4’, assigning the response variable to gesture duration  $d$  for the subset of the data which  
 117 excluded all durations from the outlier gesture Object shake, performed more than 250 times in the  
 118 dataset. Into this we included <sup>a</sup>Proportion (Proportion of gesture type within the dataset), and  
 119 <sup>b</sup>Category (manual or whole-body gesture types), and their interaction as fixed effects. We included  
 120 Signaller ID as a random effect. For each predictor, parameter estimate and standard error (SE) are  
 121 reported with standardised parameters ( $Parameter=Estimate/SE$ ) and confidence intervals. We also  
 122 report model random effect variance ( $\sigma^2$ ) and between-individual variation ( $\tau_{00}$  Signaller).

123

124 As for Model 1, when ranking models based on their AIC score all the factors were included  
 125 in the best-fitting model (Table 2). However, in contrast to Model 1, once the models were  
 126 ranked based on their BIC value, which favours parsimonious model, none of the factors  
 127 were included in the best-fitting model (Table 3).

128

129 **Table 2. Model 2 ranking based on AIC values.**

| <b>Model predictors</b>                                                        | <b><i>df</i></b> | <b><i>AIC</i></b> | <b><i>Delta</i></b> | <b><i>Weight</i></b> |
|--------------------------------------------------------------------------------|------------------|-------------------|---------------------|----------------------|
| <b>Proportion<sup>a</sup>, Category<sup>b</sup>, Proportion *<br/>Category</b> | <b>6</b>         | <b>823.3</b>      | <b>0.00</b>         | <b>0.503</b>         |
| Proportion                                                                     | 4                | 825.2             | 1.86                | 0.199                |
| Intercept only                                                                 | 3                | 825.2             | 1.92                | 0.192                |
| Category, Proportion                                                           | 5                | 827.7             | 4.43                | 0.055                |
| Category                                                                       | 4                | 827.9             | 4.58                | 0.051                |

130 Listed above are the model predictors. Outcome variable is gesture duration, with Signaller ID as a  
 131 random factor. For each predictor combination, we report degrees of freedom (*df*), AIC value,  
 132 difference in AIC values with first ranking model (*Delta*), and the relative likelihood of the model  
 133 (weight) (Burnham & Anderson, 2004). The best fit model is highlighted in bold. <sup>a</sup>Proportion =  
 134 Proportion of gesture type within the dataset; <sup>b</sup>Category = Manual or whole-body gesture types.

135

136 **Table 3. Model 2 ranking based on BIC values.**

| <b>Fixed factors</b>                          | <b><i>df</i></b> | <b><i>BIC</i></b> | <b><i>Delta</i></b> | <b><i>Weight</i></b> |
|-----------------------------------------------|------------------|-------------------|---------------------|----------------------|
| <b>Intercept only</b>                         | <b>3</b>         | <b>836.3</b>      | <b>0.00</b>         | <b>0.818</b>         |
| Proportion <sup>a</sup>                       | 4                | 839.9             | 3.62                | 0.134                |
| Category <sup>b</sup>                         | 4                | 842.6             | 6.35                | 0.034                |
| Proportion, Category, Proportion<br>*Category | 6                | 845.4             | 9.14                | 0.008                |
| Proportion, Category,                         | 5                | 846.2             | 9.88                | 0.006                |

138 Listed above are the model predictors. Outcome variable is gesture duration, with Signaller ID as a  
139 random factor. For each predictor combination, we report degrees of freedom (*df*), BIC value,  
140 difference in BIC values with first ranking model (*Delta*), and the relative likelihood of the model  
141 (weight) (Burnham & Anderson, 2004). Best fit model is highlighted in bold. <sup>a</sup>Proportion = Proportion  
142 of gesture type within the dataset; <sup>b</sup>Category = Manual or whole-body gesture types.  
143

144 **Supporting information 7**

145 **Untransformed data GLMM results**

146 Results for the GLMM analyses with the untransformed response variable gesture duration.

147 Results for Model 1, 2 and 3 with untransformed data (Table 1, 2, 3) are all in line with the

148 results for the analysis that used log-transformed gesture duration reported in the main

149 paper.

150

151 **Table 1. GLMM results for Model 1 with untransformed response variable.**

| Predictors              | Estimate ± SE  | Parameter | 95% Confidence intervals |       |
|-------------------------|----------------|-----------|--------------------------|-------|
|                         |                |           | Lower                    | Upper |
| (Intercept)             | 1.84 ± 0.8     | 2.313     | 0.28                     | 3.40  |
| Proportion <sup>a</sup> | -15.92 ± 22.41 | -0.711    | -59.75                   | 27.91 |
| Category <sup>b</sup>   | -0.17 ± 0.81   | -0.204    | -1.76                    | 1.42  |
| Proportion*Category     | 18.97 ± 22.41  | 0.847     | -24.87                   | 62.81 |
| <b>Random effect</b>    |                |           |                          |       |
| $\sigma^2$              | 5.07           |           |                          |       |
| $\tau_{00}$ Signaller   | 0.00           |           |                          |       |
| Number of individuals   | 16             |           |                          |       |

152 With Model 1 we tested for Zipf's law of brevity by fitting a Generalized Linear Mixed Model using

153 'lme4', assigning the response variable to gesture duration  $d$ . Into this we included <sup>a</sup>Proportion

154 (Proportion of gesture type within the dataset), and <sup>b</sup>Category (Manual or whole-body gesture

155 types), and their interaction as fixed effects. We included Signaller ID as a random effect. For each

156 predictor, parameter estimate and standard error (SE) are reported with standardised parameters

157 ( $Parameter=Estimate/SE$ ) and confidence intervals. We also report model random effect variance

158 ( $\sigma^2$ ) and between-individual variation ( $\tau_{00}$  Signaller).

159

160

161 **Table 2. GLMM results for Model 2 with untransformed response variable.**

| Predictors              | Estimate ± SE  | Parameter | 95% Confidence intervals |       |
|-------------------------|----------------|-----------|--------------------------|-------|
|                         |                |           | Lower                    | Upper |
| (Intercept)             | 2.35 ± 0.74    | 3.179     | 0.91                     | 3.79  |
| Proportion <sup>a</sup> | -15.21 ± 10.25 | -1.483    | -35.21                   | 4.91  |
| Category <sup>b</sup>   | -0.24 ± 0.74   | -0.325    | -1.69                    | 1.20  |
| Proportion*Category     | 16.49 ± 10.57  | 1.560     | -4.28                    | 37.08 |
| <b>Random effect</b>    |                |           |                          |       |
| $\sigma^2$              | 3.53           |           |                          |       |
| $\tau_{00}$ Signaller   | 0.71           |           |                          |       |
| Number of individuals   | 16             |           |                          |       |

172 In Model 2 we tested for Zipf’s law of brevity by fitting a Generalized Linear Mixed Model using  
 173 ‘lme4’, assigning the response variable to gesture duration  $d$  for the subset of the data which  
 174 excluded all durations from the outlier gesture Object shake, performed more than 250 times in the  
 175 dataset. Into this we included <sup>a</sup>Proportion (Proportion of gesture type within the dataset), and  
 176 <sup>b</sup>Category (Manual or whole-body gesture types), and their interaction as fixed effects. We included  
 177 Signaller ID as a random effect. For each predictor, parameter estimate and standard error (SE) are  
 178 reported with standardised parameters ( $Parameter=Estimate/SE$ ) and confidence intervals. We also  
 179 report model random effect variance ( $\sigma^2$ ) and between-individual variation ( $\tau_{00}$  Signaller).  
 180

181 **Table 3. GLMM results for Model 3 with untransformed data**

| Predictors              | Estimate ± SE       | Parameter     | 95% Confidence intervals |              |
|-------------------------|---------------------|---------------|--------------------------|--------------|
|                         |                     |               | Lower                    | Upper        |
| (Intercept)             | 3.14 ± 0.33         | 9.451         | 2.50                     | 3.79         |
| PWB <sup>a</sup>        | -2.17 ± 1.17        | -1.850        | -4.45                    | 0.16         |
| <b>Size<sup>b</sup></b> | <b>-0.45 ± 0.16</b> | <b>-2.820</b> | <b>-0.75</b>             | <b>-0.13</b> |
| PWB*Size                | 0.59 ± 0.73         | 0.805         | -0.86                    | 2.01         |
| <b>Random effect</b>    |                     |               |                          |              |
| $\sigma^2$              | 5.19                |               |                          |              |
| $\tau_{00}$ Signaller   | 0.38                |               |                          |              |
| Number of individuals   | 16                  |               |                          |              |

182 With Model 3 we tested for Menzerath’s law by fitting a Generalized Linear Mixed Model using  
 183 ‘lme4’, assigning the response variable to the average gesture duration  $t$  within the sequence. Into  
 184 this we included <sup>a</sup>PWB (proportion of whole-body gesture types within a sequence) and <sup>b</sup>Size  
 185 (number of tokens in a sequence), and their interaction as fixed effects. For each predictor,  
 186 parameter estimate and standard error (SE) are reported with standardised parameters  
 187 ( $t=Estimate/SE$ ) and confidence intervals. We also report model random effect variance ( $\sigma^2$ ) and  
 188 between-individual variation ( $\tau_{00}$  Signaller). Significant results are highlighted in bold.  
 189



190 **Supporting information 8**

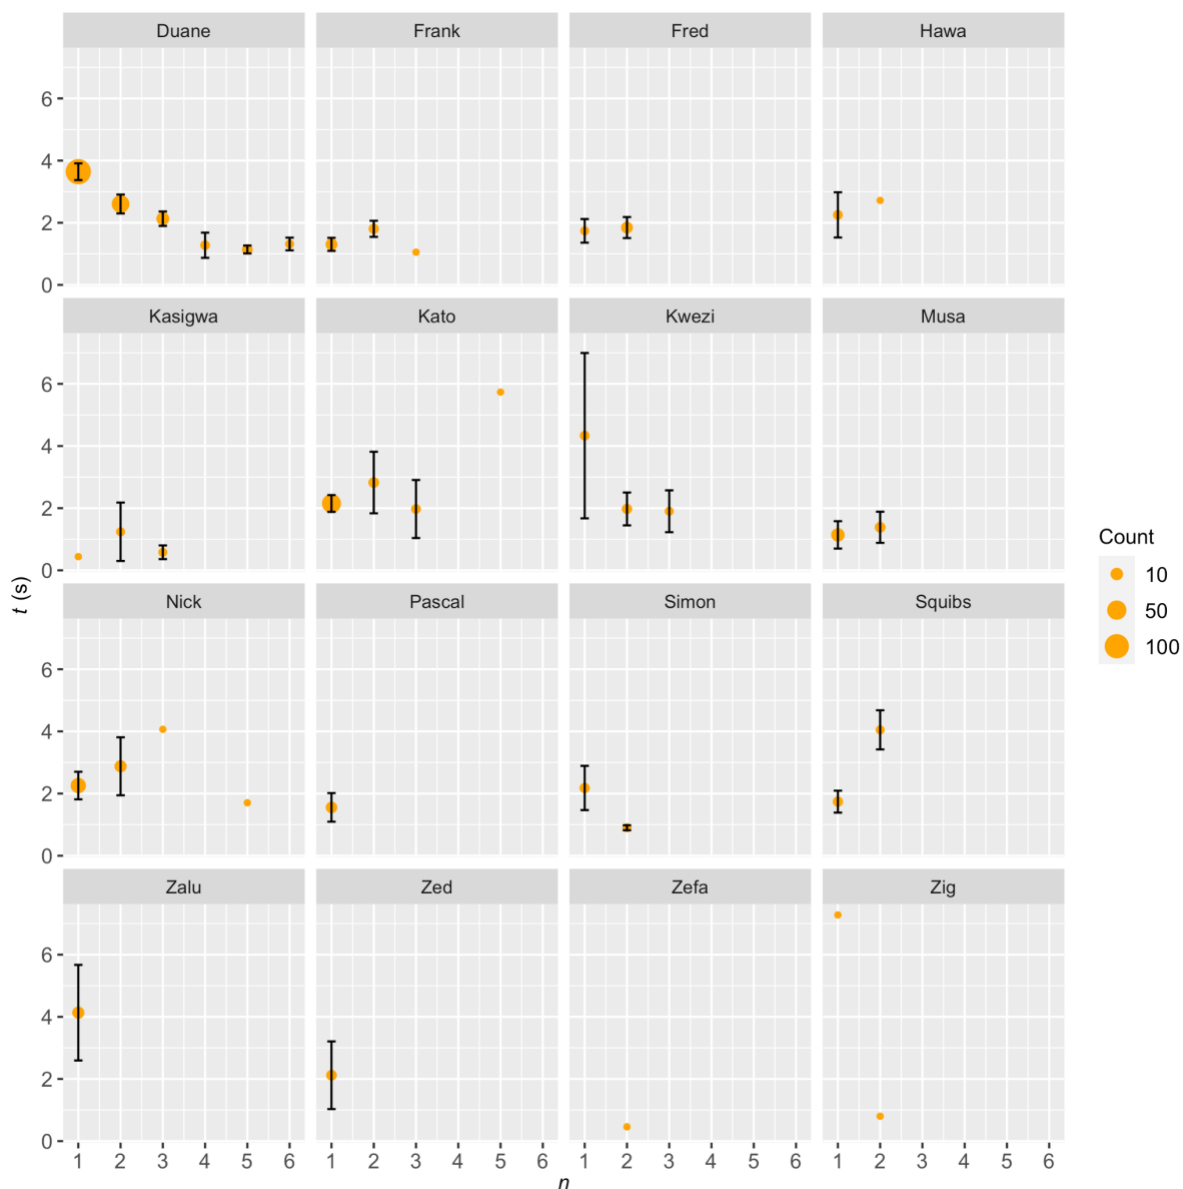

191 **S8 Fig. Relationship between sequence size  $n$  and average constituent gesture duration  $t$**   
 192 **for chimpanzee sexual solicitation gestural sequences based on individual identity.** Point  
 193 size indicates frequency of sequences with the same sequence size analysed in the dataset.

194

195 **Supporting information 9**

196 **Menzerath's law in subset excluding the outlier individual Duane**

197 No significant correlation was found between sequence size and average gesture duration in  
198 the sequence on the dataset which excluded gestural sequences performed by Duane  
199 (Spearman correlation:  $r_s=0.05$ ,  $n=187$ ,  $p=0.25$ ). In agreement,  $M=558.43$  and was not  
200 significantly small ( $p=0.601$ ).

201

202 The GLMM analysis on the reduced dataset confirmed the absence of patterns in  
203 concordance with Menzerath's law, with no factor having an effect on average constituent  
204 duration (Table 1).

205 **Table 1. GLMM results for the model testing Menzerath's law in a subset of the dataset.**

| Predictors                    | Estimate $\pm$ SE | Parameter | Confidence intervals |       |
|-------------------------------|-------------------|-----------|----------------------|-------|
|                               |                   |           | Lower                | Upper |
| (Intercept)                   | 0.35 $\pm$ 0.19   | 1.861     | -0.02                | 0.71  |
| <i>PWB</i> <sup>a</sup>       | -0.70 $\pm$ 0.49  | -1.428    | -1.67                | 0.29  |
| Size                          | 0.07 $\pm$ 0.11   | 0.724     | -0.12                | 0.27  |
| <i>PWB</i> <sup>a</sup> *Size | 0.24 $\pm$ 0.34   | 0.719     | -0.42                | 0.89  |
| <b>Random effect</b>          |                   |           |                      |       |
| $\sigma^2$                    | 0.68              |           |                      |       |
| $\tau_{00}$ Signaller         | 0.12              |           |                      |       |
| Number of individuals         | 15                |           |                      |       |

206 We tested for Menzerath's law by fitting a Generalized Linear Mixed Model using 'lme4', assigning  
207 the response variable to the average gesture duration  $t$  within the sequence but excluding data from  
208 the outlier individual *Duane*. Into this we included <sup>a</sup>PWB (proportion of whole-body gestures within  
209 a sequence) and Size (number of tokens in a sequence), and their interaction as fixed effects. For  
210 each predictor, parameter estimate and standard error (SE) are reported with standardised

211 parameters ( $t=Estimate/SE$ ) and confidence intervals. We also report model random effect variance

212 ( $\sigma^2$ ) and between-individual variation ( $\tau_{00\_Signaller}$ ). Significant results are highlighted in bold.

213
